# Supplementary material for: Physiological and Proteomic Analyses of Molybdenum- and Ethylene-Responsive Mechanisms in Rubber Latex
Source: Front Plant Sci. 2018 May 15;9:621. doi: 10.3389/fpls.2018.00621 (PMC5962772; doi:10.3389/fpls.2018.00621)
Supplement: TABLE S1 — MS identification of DEPs in rubber latex after Eth, Mo, and EMo treatments. [file Table_1.XLSX]

## Sheet: MS identification of DEPs
Table S1-1 MS information of the 169 differentially expressed protein spots								Vol % of treatment								Ratio of protein abundance
NO.	Accession number	Name	Thero.pI/Mr	Exper. pI/Mr	Mathed peptide number	Sequence coverage %	Mascot score	CK	±SD	Eth	±SD	Mo	±SD	EMo	±SD	CK/CK	Eth/CK	Mo/CK	EMo/CK
1	scaffold0698_149194.mRNA1	uncharacterized protein	4.17/29.87	3.50/50.32	2	8	98	0.024	0.00264575	0.003	0.000264575	0.006	0.0002	0.007	0.0007	1	0.13	0.233	0.273
2	scaffold1173_171897.mRNA1	Aldose 1-epimerase like;	5.70/36.96	5.80/37.01	4	23	127	0.013	0.00173205	0.002	0.0002	0.008	0.000264575	0.002	0.0001	1	0.149	0.613	0.183
3	scaffold0901_132647.mRNA1	ADP-ribosylation factor GTPase-activating protein AGD13 like;	5.14/19.416	5.12/19.53	5	55	467	0.031	0.0034641	0.007	0.000264575	0.045	0.00264575	0.036	0.00173205	1	0.222	1.448	1.172
4	scaffold0155_515853.mRNA1	Pro-hevein like;	8.15/23.04	5.20/17.54	2	18	211	0.036	0.002	0.01	0.001	0.041	0.00264575	0.03	0.00264575	1	0.273	1.124	0.817
5	scaffold4512_855.mRNA1	Osmotin-like protein OSM34 like;	5.23/27.68	6.22/21.43	8	50	607	0.235	0.0156205	0.067	0.00264575	0.065	0.0072111	0.191	0.0052915	1	0.284	0.278	0.813
6	scaffold0026_1110574.mRNA1	Actin-7 like;	5.31/41.89	5.31/93.24	10	40	644	0.013	0.003	0.004	0.000264575	0.004	0.000264575	0.007	0.0003	1	0.286	0.278	0.566
7	scaffold0026_1110574.mRNA1	Actin-7 like;	5.31/41.89	5.31/94.32	10	40	653	0.015	0.00360555	0.004	0.0002	0.005	0.0002	0.007	0.000264575	1	0.297	0.351	0.49
8	scaffold0944_314376.mRNA1	Glutathione S-transferase PARB like;	6.31/23.87	6.85/23.54	5	36	317	0.023	0.00264575	0.007	0.000360555	0.013	0.001	0.009	0.000264575	1	0.3	0.584	0.386
9	scaffold0217_269209.mRNA1	uncharacterized protein	9.49/20.42	9.17/16.56	4	30	180	0.159	0.019	0.049	0.00173205	0.091	0.002	0.054	0.0043589	1	0.311	0.574	0.338
10	scaffold1093_241290.mRNA1	Pro-hevein like;	8.12/23.45	8.12/19.65	3	26	263	0.131	0.00608276	0.053	0.00360555	0.137	0.00264575	0.114	0.0052915	1	0.41	1.049	0.873
11	scaffold1093_241290.mRNA1	Pro-hevein like;	8.12/23.45	8.30/19.65	3	26	262	0.237	0.0101489	0.102	0.0111355	0.25	0.00655744	0.188	0.0117898	1	0.429	1.054	0.791
12	scaffold0029_867537.mRNA1	Universal stress protein A-like protein	5.87/20.17	6.18/21.05	3	19	202	0.036	0.004	0.016	0.00360555	0.015	0.00360555	0.024	0.00264575	1	0.449	0.407	0.671
13	scaffold0100_712967.mRNA1	Patatin-like protein 2 like;	5.13/49.14	4.56/46.76	4	12	306	0.069	0.00264575	0.031	0.00458258	0.063	0.00608276	0.062	0.00264575	1	0.453	0.0919	0.903
14	scaffold4512_855.mRNA1	Osmotin-like protein OSM34 like;	5.23/27.68	6.50/21.43	6	45	467	0.016	0.00360555	0.008	0.00034641	0.032	0.0043589	0.008	0.000264575	1	0.477	2.029	0.527
15	scaffold0013_2366000.mRNA1	Annexin-like protein RJ4 like;	7.72/36.06	7.50/35.56	3	11	198	0.043	0.00360555	0.021	0.00360555	0.019	0.002	0.022	0.003	1	0.485	0.431	0.511
16	scaffold0479_272073.mRNA1	Obg-like ATPase 1 like;	6.62/44.94	7.52/47.43	9	35	689	0.027	0.00360555	0.014	0.00173205	0.016	0.00173205	0.015	0.00173205	1	0.498	0.574	0.536
17	scaffold0155_515853.mRNA1	Pro-hevein like;	8.15/23.04	5.53/19.27	3	23	286	0.178	0.0043589	0.089	0.007	0.147	0.005	0.179	0.004	1	0.503	0.826	1.009
18	scaffold1222_136753.mRNA1	Rubber elongation factor protein like;	5.01/14.71	4.60/66.76	5	50	313	0.035	0.006245	0.018	0.002	0.03	0.0034641	0.021	0.00264575	1	0.51	0.85	0.593
19	scaffold1093_209300.mRNA1	Pro-hevein like;	6.79/11.84	8.60/15.65	2	36	250	0.12	0.0117898	0.0652	0.00393954	0.145	0.0072111	0.083	0.0043589	1	0.519	1.215	0.694
20	scaffold0625_11329.mRNA1	Glucan endo-1,3-beta-glucosidase, basic vacuolar isoform like;	9.27/41.51	9.60/39.45	9	41	1073	0.234	0.00556776	0.122	0.010583	0.368	0.00781025	0.175	0.00360555	1	0.524	1.576	0.751
21	scaffold0331_686228.mRNA1	Vacuolar protein sorting-associated protein 2 homolog 1 like;	5.55/25.16	5.84/34.23	4	20	231	0.007	0.000360555	0.004	0.000173205	0.011	0.00264575	0.008	0.0002	1	0.532	1.585	1.125
22	scaffold0625_11329.mRNA1	Glucan endo-1,3-beta-glucosidase, basic vacuolar isoform like;	9.27/41.51	9.16/37.62	5	24	375	0.04	0.0034641	0.022	0.00264575	0.018	0.00264575	0.016	0.001	1	0.534	0.452	0.39
23	scaffold1735_70085.mRNA1	ricin B-like lectin EULS3	7.77/20.72	8.22/20.65	8	55	425	0.048	0.004	0.026	0.0052915	0.04	0.00264575	0.034	0.0043589	1	0.538	0.821	0.704
24	scaffold0155_515853.mRNA1	Pro-hevein like;	8.15/23.04	5.60/18.97	2	18	235	0.469	0.0353695	0.254	0.00916515	0.402	0.00888819	0.364	0.0158745	1	0.542	0.857	0.776
25	scaffold0370_918136.mRNA1	Proteasome subunit beta type-4 like;	6.97/27.90	8.30/24.61	9	55	823	0.033	0.00458258	0.018	0.002	0.03	0.00360555	0.003	0.0004	1	0.553	0.915	0.093
26	scaffold0625_426005.mRNA1	Acylpyruvase FAHD1, mitochondrial like	6.52/24.25	7.20/24.61	4	30	382	0.033	0.00173205	0.019	0.00264575	0.058	0.00655744	0.054	0.0034641	1	0.566	1.765	1.657
27	scaffold0564_474434.mRNA1	uncharacterized protein	4.17/33.89	3.42/65.32	6	33	360	0.057	0.00519615	0.033	0.002	0.037	0.00264575	0.039	0.00458258	1	0.58	0.643	0.687
28	scaffold0745_297880.mRNA1	Elongation factor 1-alpha like;	9.20/49.75	9.70/51.54	3	10	136	0.031	0.0043589	0.018	0.00264575	0.023	0.0043589	0.02	0.00264575	1	0.588	0.731	0.623
29	scaffold0155_515853.mRNA1	Pro-hevein like	8.15/23.04	6.70/14.86	2	18	168	0.175	0.0087178	0.104	0.00655744	0.164	0.00608276	0.247	0.00608276	1	0.593	0.939	1.414
30	scaffold0625_11329.mRNA1	Glucan endo-1,3-beta-glucosidase, basic vacuolar isoform like;	9.27/41.51	9.64/38.67	10	42	846	2.45	0.298161	1.455	0.093984	3.844	0.238353	2.337	0.0992421	1	0.594	1.569	0.954
31	scaffold1735_70085.mRNA1	ricin B-like lectin EULS3	7.77/20.72	8.12/20.65	8	51	494	0.17	0.0104403	0.101	0.00984886	0.162	0.0112694	0.175	0.0111355	1	0.597	0.954	1.031
32	scaffold0143_850373.mRNA1	Hevamine-A like;	8.07/34.01	9.60/33.36	7	39	830	0.071	0.00458258	0.044	0.00458258	0.098	0.00458258	0.037	0.0043589	1	0.614	1.384	0.517
33	scaffold0491_874744.mRNA1	Elongation factor 1-delta like;	4.51/25.91	4.02/35.68	5	31	192	0.035	0.00360555	0.022	0.00173205	0.007	0.000264575	0.016	0.00264575	1	0.615	0.201	0.455
34	scaffold0935_348908.mRNA1	Proteasome subunit beta type-5 like;	5.86/29.35	8.03/24.58	6	37	472	0.048	0.004	0.03	0.00264575	0.054	0.00173205	0.021	0.003	1	0.625	1.122	0.445
35	scaffold0645_687748.mRNA1	18.5 kDa class I heat shock protein like;	6.00/18.33	6.20/19.17	5	43	420	0.058	0.00458258	0.038	0.00173205	0.035	0.00264575	0.036	0.004	1	0.646	0.607	0.625
36	scaffold1194_13551.mRNA1	(+)-neomenthol dehydrogenase like;	7.08/88.35	5.54/34.56	6	10	332	0.026	0.00360555	0.017	0.001	0.033	0.00360555	0.018	0.002	1	0.649	1.291	0.721
37	scaffold1220_115657.mRNA1	ATP-citrate synthase beta chain protein 1 like;	7.95/66.48	7.96/65.43	4	10	263	0.019	0.00264575	0.012	0.00264575	0.023	0.00264575	0.02	0.00173205	1	0.658	1.222	1.101
38	scaffold1222_136753.mRNA1	Rubber elongation factor protein like;	5.04/14.71	4.90/36.65	3	25	181	0.031	0.00173205	0.021	0.003	0.042	0.00360555	0.031	0.002	1	0.66	1.326	0.977
39	scaffold0686_576053.mRNA1	pyridoxal biosynthesis protein PDX1 like;	6.26/33.40	6.70/35.43	5	27	162	0.017	0.00173205	0.037	0.00458258	0.071	0.00264575	0.017	0.00173205	1	2.164	4.163	1.027
40	scaffold0166_1819893.mRNA1	Uncharacterized protein Os08g0359500 like;	5.37/12.86	5.34/14.71	2	22	129	0.402	0.0132288	0.817	0.0132288	0.623	0.00953939	0.843	0.0134536	1	2.034	1.551	2.1
41	scaffold1222_136753.mRNA1	Rubber elongation factor protein like;	5.04/14.71	5.00/14.71	6	63	294	0.461	0.017088	0.925	0.00964365	0.656	0.0147986	0.889	0.01249	1	2.006	1.423	1.929
42	scaffold0878_145544.mRNA1	Importin subunit alpha-1 like;	2.28/59.16	5.30/65.03	4	11	123	0.016	0.00264575	0.032	0.001	0.016	0.00264575	0.014	0.00173205	1	1.958	0.961	0.863
43	scaffold0026_1110574.mRNA1	Actin-7 like;	5.31/41.90	5.35/52.98	9	36	521	0.016	0.00264575	0.03	0.0043589	0.022	0.00264575	0.018	0.00173205	1	1.952	1.393	1.17
44	scaffold0625_1132.mRNA1	Glucan endo-1,3-beta-glucosidase, basic vacuolar isoform like;	7.77/41.18	9.42/36.64	8	37	764	0.242	0.00519615	0.224	0.00556776	0.083	0.0043589	0.187	0.0072111	1	0.928	0.344	0.775
45	scaffold1465_23608.mRNA1	5-methyltetrahydropteroyltriglutamate--homocysteine methyltransferase like;	6.30/85.15	6.88/85.15	7	16	558	0.008	0.001	0.014	0.00173205	0.01	0.001	0.013	0.00173205	1	1.811	1.324	1.662
46	scaffold1222_136753.mRNA1	Rubber elongation factor protein like;	5.04/14.71	9.80/14.71	6	55	449	0.302	0.0195192	0.544	0.00781025	0.447	0.00793725	0.391	0.003	1	1.802	1.478	1.295
47	scaffold0014_3373206.mRNA1	UDP-glucose 6-dehydrogenase 1 like;	5.90/53.49	5.88/55.76	4	13	256	0.016	0.00458258	0.028	0.00264575	0.02	0.001	0.017	0.00173205	1	1.758	1.234	1.089
48	scaffold1222_136753.mRNA1	Rubber elongation factor protein like;	5.04/14.71	5.13/14.71	5	50	441	0.546	0.014	0.926	0.0151327	0.797	0.0121244	1.219	0.0298161	1	1.696	1.459	2.232
49	scaffold0457_538964.mRNA1	Alpha-soluble NSF attachment protein 2 like;	5.05/32.77	4.98/34.23	6	30	401	0.04	0.01	0.06	0.00655744	0.047	0.00458258	0.032	0.001	1	1.622	1.18	0.804
50	scaffold1222_136753.mRNA1	Rubber elongation factor protein like;	5.04/14.71	5.05/14.71	7	63	480	0.672	0.0202978	1.075	0.0478226	0.922	0.00916515	1.424	0.0366606	1	1.599	1.371	2.117
51	scaffold0884_428899.mRNA1	Triosephosphate isomerase, cytosolic like;	5.90/27.57	6.50/26.87	7	32	451	0.041	0.0043589	0.064	0.00173205	0.05	0.0034641	0.044	0.00264575	1	1.559	1.21	1.061
52	scaffold1479_76107.mRNA1	Acetyl-CoA acetyltransferase, cytosolic 1 like;	6.01/41.65	6.10/47.43	4	20	299	0.012	0.001	0.018	0.00173205	0.009	0.000264575	0.01	0.00264575	1	1.559	0.741	0.816
53	scaffold0438_1023124.mRNA1	phosphatase SPAC5H10.03 like;	7.07/31.33	6.54/33.68	7	27	454	0.034	0.0043589	0.052	0.00264575	0.043	0.00173205	0.036	0.0052915	1	1.542	1.274	1.081
54	scaffold0878_145544.mRNA1	Importin subunit alpha-1 like;	5.28/59.16	5.36/65.03	6	20	441	0.033	0.004	0.05	0.003	0.036	0.00264575	0.038	0.00173205	1	1.529	1.097	1.167
55	scaffold0331_834438.mRNA1	Phospholipase D alpha 1 like;	5.60/88.90	6.00/88.90	9	17	487	0.018	0.002	0.028	0.002	0.023	0.00173205	0.034	0.00264575	1	1.512	1.231	1.878
56	scaffold0280_1322570.mRNA1	Dynamin-related protein 4C like;	5.91/74.32	6.44/74.43	9	16	538	0.03	0.00360555	0.046	0.00264575	0.028	0.002	0.036	0.001	1	1.509	0.904	1.179
57	scaffold4512_855.mRNA1	Osmotin-like protein OSM34 like;	5.23/27.68	8.13/22.32	5	34	453	1.124	0.0314802	1.114	0.0696348	0.125	0.0108167	0.585	0.0052915	1	0.992	0.111	0.521
58	scaffold4512_855.mRNA1	Osmotin-like protein OSM34 like;	5.23/27.68	6.22/22.32	4	30	348	0.082	0.007	0.09	0.0008	0.01	0.00173205	0.036	0.00173205	1	1.101	0.121	0.444
59	scaffold0625_1132.mRNA1	Glucan endo-1,3-beta-glucosidase, basic vacuolar isoform like;	7.77/41.18	9.36/36.64	6	25	691	0.284	0.0087178	0.247	0.00458258	0.06	0.0043589	0.339	0.00754983	1	0.869	0.211	1.194
60	scaffold0444_175845.mRNA1	Ubiquitin-conjugating enzyme E2 35 like;	6.74/17.27	6.73/15.45	6	58	389	0.033	0.0043589	0.026	0.00360555	0.007	0.001	0.009	0.001	1	0.792	0.225	0.265
61	scaffold0664_98467.mRNA1	Caffeic acid 3-O-methyltransferase like;	5.54/36.83	5.82/37.67	6	29	456	0.015	0.002	0.018	0.00173205	0.004	0.001	0.013	0.00264575	1	1.239	0.253	0.907
62	scaffold0066_550349.mRNA1	prefoldin subunit 5 like;	8.59/17.31	9.20/15.56	5	40	456	0.022	0.00360555	0.016	0.00173205	0.006	0.0003	0.052	0.00264575	1	0.742	0.29	2.34
63	scaffold4512_855.mRNA1	Osmotin-like protein OSM34 like;	5.23/27.68	8.00/16.04	2	12	112	0.028	0.00173205	0.031	0.00264575	0.01	0.000866025	0.029	0.00173205	1	1.097	0.335	1.033
64	scaffold0114_231043.mRNA1	Cysteine synthase like;	6.22/75.28	5.30/34.65	7	16	585	0.022	0.00264575	0.023	0.001	0.009	0.001	0.005	0.0004	1	1.039	0.387	0.245
65	scaffold0625_1132.mRNA1	Glucan endo-1,3-beta-glucosidase, basic vacuolar isoform like;	7.77/41.18	9.50/36.52	7	32	744	0.336	0.0130767	0.385	0.0117898	0.15	0.00754983	0.279	0.00360555	1	1.148	0.447	0.83
66	scaffold0340_174387.mRNA1	Malignant T-cell-amplified sequence 1 like;	8.46/20.28	8.90/22.89	7	49	341	0.011	0.002	0.012	0.00173205	0.005	0.0001	0.023	0.0052915	1	1.138	0.45	2.206
67	scaffold0197_1486649.mRNA1	Uncharacterized protein Os08g0359500 like;	4.48/20.46	4.00/24.58	4	29	235	0.028	0.003	0.03	0.0034641	0.013	0.00173205	0.013	0.001	1	1.064	0.453	0.46
68	scaffold0625_591792.mRNA1	Translationally-controlled tumor protein homolog like;	4.47/19.16	4.05/19.54	6	64	505	0.196	0.006245	0.166	0.00754983	0.09	0.0052915	0.126	0.007	1	0.847	0.458	0.645
69	scaffold0387_85080.mRNA1	Macro domain-containing protein VPA0103 like	7.67/29.50	5.15/3.54	4	19	170	0.076	0.00264575	0.078	0.00264575	0.038	0.00173205	0.044	0.0052915	1	1.025	0.498	0.587
70	scaffold1772_2818.mRNA1	universal stress protein PHOS32	7.70/22.50	6.24/19.27	6	45	470	0.035	0.00264575	0.037	0.00360555	0.018	0.00264575	0.034	0.0043589	1	1.072	0.509	0.975
71	scaffold0005_28735.mRNA1	S-adenosylmethionine synthase 2 like;	5.59/43.54	5.72/49.64	5	18	182	0.015	0.00556776	0.019	0.0043589	0.008	0.001	0.012	0.00173205	1	1.253	0.519	0.795
72	scaffold0197_1256978.mRNA1	Glutathione S-transferase like;	5.81/24.00	6.10/24.00	6	42	259	0.022	0.00264575	0.015	0.001	0.011	0.002	0.015	0.00173205	1	0.673	0.524	0.684
73	scaffold0143_850373.mRNA1	Hevamine-A like;	8.07/34.01	7.80/33.36	6	32	521	0.061	0.006245	0.069	0.002	0.032	0.001	0.063	0.004	1	1.136	0.528	1.036
74	scaffold0625_1132.mRNA1	Glucan endo-1,3-beta-glucosidase, basic vacuolar isoform like;	7.77/41.18	9.04/36.64	7	35	733	0.286	0.01249	0.219	0.00964365	0.15	0.007	0.243	0.00793725	1	0.766	0.529	0.851
75	scaffold0344_256841.mRNA1	18.5 kDa class I heat shock protein like;	5.97/18.06	6.10/17.67	4	26	176	0.045	0.00264575	0.046	0.00173205	0.024	0.00173205	0.039	0.0043589	1	1.02	0.53	0.879
76	scaffold0026_327123.mRNA1	Chlorophyllase type 0 like;	6.30/37.79	6.50/19.45	2	16	182	0.231	0.0072111	0.203	0.00953939	0.123	0.00360555	0.273	0.0072111	1	0.879	0.534	1.182
77	scaffold0618_714426.mRNA1	Beta-glucosidase 42 like;	5.49/56.73	5.60/65.03	5	15	263	0.038	0.00458258	0.039	0.00264575	0.02	0.003	0.035	0.00264575	1	1.038	0.535	0.923
78	scaffold0026_327123.mRNA1	Chlorophyllase type 0 like;	6.30/37.79	6.30/19.45	3	19	158	0.082	0.004	0.08	0.0173205	0.044	0.0043589	0.099	0.0072111	1	0.976	0.539	1.2
79	scaffold0143_850373.mRNA1	Hevamine-A like;	8.07/34.01	8.08/33.68	8	42	721	0.478	0.01249	0.475	0.00953939	0.259	0.00458258	0.437	0.005	1	0.995	0.543	0.913
80	scaffold0143_850373.mRNA1	Hevamine-A like;	8.07/34.01	5.96/33.68	2	12	94	0.012	0.00264575	0.01	0.001	0.007	0.0002	0.008	0.000360555	1	0.819	0.555	0.683
81	scaffold4512_855.mRNA1	Osmotin-like protein OSM34 like;	5.23/27.68	7.73/22.32	4	30	424	0.567	0.0121244	0.579	0.0167033	0.318	0.00608276	0.377	0.0103923	1	1.021	0.56	0.665
82	scaffold0884_428899.mRNA1	Triosephosphate isomerase, cytosolic like;	5.90/27.57	5.82/26.76	7	32	449	0.048	0.00781025	0.045	0.004	0.027	0.00264575	0.038	0.00173205	1	0.952	0.574	0.799
83	scaffold0444_830660.mRNA1	Alcohol dehydrogenase class-3 like;	7.49/41.71	7.16/47.41	4	20	233	0.072	0.00264575	0.067	0.00264575	0.042	0.001	0.072	0.00360555	1	0.934	0.576	1.003
84	scaffold1479_76107.mRNA1	Acetyl-CoA acetyltransferase, cytosolic 1 like;	6.01/41.65	6.78/45.65	10	48	1070	0.23	0.0052915	0.262	0.0043589	0.133	0.00793725	0.238	0.0138924	1	1.137	0.576	1.036
85	scaffold0143_850373.mRNA1	Hevamine-A like;	8.07/34.01	8.20/33.68	7	32	605	0.248	0.0105357	0.237	0.0052915	0.152	0.00360555	0.206	0.006245	1	0.958	0.612	0.829
86	scaffold0947_141222.mRNA1	Serpin-ZX like;	5.94/42.82	6.20/43.21	3	13	262	0.115	0.0105357	0.122	0.003	0.072	0.004	0.102	0.00519615	1	1.058	0.622	0.884
87	scaffold1465_23608.mRNA1	5-methyltetrahydropteroyltriglutamate--homocysteine methyltransferase like;	6.30/85.15	7.11/85.15	9	20	510	0.028	0.00360555	0.025	0.00173205	0.017	0.00173205	0.026	0.00264575	1	0.898	0.622	0.92
88	scaffold1222_136753.mRNA1	Rubber elongation factor protein like;	5.04/14.71	5.80/15.43	2	17	76	0.016	0.001	0.013	0.00264575	0.01	0.0014	0.01	0.0003	1	0.828	0.627	0.636
89	scaffold0753_102318.mRNA1	Hsp70-Hsp90 organizing protein 3 like;	5.94/65.31	6.14/76.45	9	20	394	0.019	0.00173205	0.019	0.00360555	0.012	0.00217945	0.017	0.002	1	0.991	0.629	0.894
90	scaffold0768_534911.mRNA1	Desiccation protectant protein Lea14 homolog like;	4.71/35.06	4.50/36.53	7	34	450	0.076	0.00173205	0.06	0.00360555	0.048	0.00360555	0.051	0.00458258	1	0.788	0.633	0.675
91	scaffold0912_144680.mRNA1	Ankyrin repeat domain-containing protein 2 like;	4.50/37.64	4.03/36.53	3	11	168	0.095	0.0072111	0.086	0.006245	0.061	0.0043589	0.082	0.003	1	0.914	0.641	0.863
92	scaffold0280_1322570.mRNA1	Dynamin-related protein 4C like;	5.91/74.32	6.13/74.43	9	17	505	0.028	0.00458258	0.036	0.00264575	0.018	0.0043589	0.022	0.00173205	1	1.265	0.642	0.762
93	scaffold0195_965653.mRNA1	UDP-arabinopyranose mutase 3 like;	5.76/41.80	5.87/45.54	4	12	122	0.033	0.0043589	0.039	0.003	0.021	0.003	0.029	0.001	1	1.184	0.644	0.859
94	scaffold0014_23288.mRNA1	Triosephosphate isomerase, cytosolic like;	5.76/27.53	6.20/26.67	9	45	422	0.191	0.006245	0.176	0.00608276	0.123	0.0052915	0.179	0.003	1	0.922	0.644	0.934
95	scaffold0434_14371.mRNA1	Glutathione S-transferase F9 like;	8.44/25.50	7.40/23.54	7	39	645	0.177	0.00173205	0.141	0.00458258	0.115	0.00556776	0.156	0.0101489	1	0.797	0.652	0.882
96	scaffold0139_994147.mRNA1	Glucose and ribitol dehydrogenase like;	5.29/32.31	5.28/36.87	7	28	478	0.021	0.002	0.025	0.0043589	0.014	0.002	0.011	0.00173205	1	1.194	0.661	0.512
97	scaffold0041_2570834.mRNA1	Aspartic proteinase A1 like;	5.73/56.53	5.20/33.68	8	24	606	0.045	0.00264575	0.053	0.006245	0.03	0.00360555	0.023	0.001	1	1.192	0.662	0.512
98	scaffold0105_276835.mRNA1	Proteasome subunit beta type-1 like;	6.20/24.88	6.16/24.61	8	52	498	0.048	0.00264575	0.043	0.00173205	0.032	0.00264575	0.045	0.00793725	1	0.898	0.664	0.931
99	scaffold1479_76107.mRNA1	Acetyl-CoA acetyltransferase, cytosolic 1 like;	6.01/41.65	7.02/45.56	7	27	639	0.047	0.00608276	0.056	0.002	0.071	0.00360555	0.043	0.002	1	1.183	1.509	0.903
100	scaffold0283_54035.mRNA1	GEM-like protein 5 like;	6.55/29.28	7.20/34.56	6	42	369	0.02	0.00360555	0.02	0.001	0.033	0.002	0.026	0.0034641	1	0.993	1.68	1.346
101	scaffold0677_448742.mRNA1	Proteasome subunit alpha type-5 like;	4.70/26.16	4.22/26.16	6	41	410	0.041	0.0034641	0.053	0.00360555	0.101	0.00556776	0.04	0.002	1	1.282	2.464	0.966
102	scaffold0017_613025.mRNA1	Cysteine proteinase inhibitor 12 like;	6.87/27.23	7.32/24.61	8	43	671	0.005	0.001	0.005	0.001	0.036	0.002	0.035	0.002	1	0.845	6.648	6.548
103	scaffold0716_566809.mRNA1	Proteasome subunit beta type-4 like;	6.32/27.80	7.84/24.61	6	36	545	0.019	0.00264575	0.015	0.001	0.016	0.00264575	0.008	0.001	1	0.773	0.826	0.395
104	scaffold0307_1066072.mRNA1	Proteasome subunit beta type-2-A like;	5.85/22.73	6.00/23.05	7	45	529	0.032	0.00360555	0.031	0.00264575	0.025	0.0052915	0.017	0.00264575	1	0.973	0.764	0.512
105	scaffold0356_425272.mRNA1	DnaJ protein homolog like;	6.04/77.568	7.08/49.87	7	17	499	0.035	0.001	0.032	0.003	0.025	0.0034641	0.02	0.00458258	1	0.914	0.725	0.566
106	scaffold0178_730225.mRNA1	aldo-keto reductase 2 like;	6.03/37.98	6.25/36.53	4	12	250	0.026	0.00264575	0.03	0.01	0.018	0.002	0.015	0.0034641	1	1.169	0.69	0.575
107	scaffold4512_855.mRNA1	Osmotin-like protein OSM34 like;	5.23/27.68	7.12/22.32	4	30	350	0.168	0.00458258	0.129	0.007	0.122	0.007	0.098	0.0034641	1	0.768	0.726	0.586
108	scaffold1222_136753.mRNA1	Rubber elongation factor protein like;	5.04/14.71	8.96/13.65	4	42	312	0.26	0.0052915	0.278	0.00866025	0.276	0.00916515	0.154	0.00984886	1	1.067	1.06	0.592
109	scaffold0548_575390.mRNA1	Stem-specific protein TSJT1 like;	5.56/27.27	5.05/36.64	7	33	373	0.028	0.002	0.022	0.0052915	0.022	0.00264575	0.017	0.00173205	1	0.812	0.785	0.607
110	scaffold0139_994147.mRNA1	Glucose and ribitol dehydrogenase like;	5.29/32.31	5.56/36.53	4	13	154	0.024	0.002	0.018	0.00264575	0.017	0.001	0.014	0.00264575	1	0.754	0.724	0.61
111	scaffold0100_712967.mRNA1	Patatin-like protein 2 like;	5.13/49.14	4.67/47.43	8	28	539	0.159	0.0052915	0.15	0.007	0.204	0.00519615	0.099	0.00360555	1	0.947	1.283	0.624
112	scaffold0031_1390956.mRNA1	Malate dehydrogenase, cytoplasmic like;	6.19/36.17	6.40/36.65	4	23	407	0.231	0.00519615	0.268	0.007	0.16	0.00608276	0.145	0.0087178	1	1.161	0.936	0.628
113	scaffold0558_100711.mRNA1	ATP-citrate synthase alpha chain protein 2 like;	5.89/57.30	6.08/49.87	7	27	479	0.015	0.001	0.017	0.00264575	0.011	0.00156205	0.01	2.45327e-18	1	1.107	0.0739	0.646
114	scaffold0041_2570834.mRNA1	Aspartic proteinase A1 like;	5.73/56.53	5.04/33.68	8	24	631	0.054	0.00458258	0.065	0.0043589	0.041	0.0034641	0.035	0.003	1	1.203	0.755	0.647
115	scaffold0050_2842364.mRNA1	Cell division cycle protein 48 homolog like;	5.15/90.31	5.22/91.32	10	22	647	0.073	0.0034641	0.075	0.0043589	0.072	0.00458258	0.112	0.009	1	1.025	0.986	1.52
116	scaffold0333_708001.mRNA1	Natterin-4 like;	5.86/54.25	5.94/66.54	10	30	517	0.011	0.00173205	0.013	0.00264575	0.008	0.001	0.019	0.00173205	1	1.197	0.758	1.764
117	scaffold1413_46445.mRNA1	Cell division cycle protein 48 homolog like;	5.33/93.90	5.40/91.32	10	20	603	0.016	0.00173205	0.016	0.00360555	0.022	0.00173205	0.033	0.002	1	1.028	1.379	2.048
118	scaffold0014_190374.mRNA1	Cysteine proteinase inhibitor like;	5.45/11.24	5.36/14.32	4	42	245	0.112	0.00264575	0.184	0.00953939	0.048	0.00458258	0.106	0.00793725	1	1.65017	0.427393	0.945545
119	scaffold0239_773114.mRNA1	prefoldin subunit 4 like;	4.45/14.56	3.90/17.54	3	31	229	0.014	0.00264575	0.013	0.00173205	0.004	0.001	0.01	2.45327e-18	1	0.909091	0.274545	0.684545
120	scaffold0677_45450.mRNA1	carboxylesterase 6 like;	5.03/37.61	5.03/36.06	7	29	329	0.011	0.002	0.013	0.002	0.004	0.001	0.009	0.001	1	1.12233	0.342312	0.790123
121	scaffold1789_16143.mRNA1	Cyclase-associated protein 1 like;	6.64/51.99	6.75/55.76	7	20	212	0.014	0.00264575	0.019	0.0043589	0.007	0.001	0.015	0.0034641	1	1.2987	0.457143	1.02597
122	scaffold0047_1944984.mRNA1	SUMO-conjugating enzyme UBC9	7.71/16.75	8.03/15.45	2	25	105	0.066	0.00173205	0.07	0.00866025	0.025	0.00264575	0.042	0.003	1	1.06496	0.378062	0.640043
123	scaffold0592_368115.mRNA1	Ankyrin repeat domain-containing protein 2 like;	4.50/37.71	4.06/43.21	7	30	341	0.161	0.003	0.134	0.0117898	0.053	0.00360555	0.12	0.00953939	1	0.829187	0.328358	0.742952
124	scaffold2041_42337.mRNA1	calcium-binding protein CML49 like;	7.48/31.74	6.98/26.64	3	14	205	0.023	0.00360555	0.021	0.00264575	0.009	0.001	0.024	0.00360555	1	0.912409	0.375912	1.00547
125	scaffold1222_136753.mRNA1	Rubber elongation factor protein like;	5.04/14.71	9.44/14.63	5	55	497	0.459	0.0117898	0.716	0.0144222	0.33	0.00655744	0.235	0.005	1	1.56006	0.719189	0.513261
126	scaffold0456_1002067.mRNA1	Fructokinase-2 like;	5.22/35.63	5.35/36.21	4	18	318	0.023	0.0043589	0.032	0.00264575	0.015	0.002	0.016	0.00264575	1	1.38889	0.6625	0.705556
127	scaffold1032_279744.mRNA1	Urease accessory protein G like;	7.02/57.30	6.42/26.64	6	20	305	0.012	0.004	0.008	0.001	0.004	0.001	0.008	0.001	1	0.706215	0.342514	0.694209
128	scaffold0005_28735.mRNA1	S-adenosylmethionine synthase 2 like;	5.59/43.54	5.82/49.64	9	37	520	0.061	0.0034641	0.082	0.00519615	0.041	0.0043589	0.075	0.01249	1	1.34409	0.666667	1.23522
129	scaffold1735_70085.mRNA1	ricin B-like lectin EULS3	7.77/20.72	7.56/20.65	7	46	440	0.209	0.00360555	0.226	0.00984886	0.119	0.008544	0.261	0.0259422	1	1.07875	0.568501	1.24488
130	scaffold1194_13551.mRNA1	(+)-neomenthol dehydrogenase like;	7.08/88.35	5.32/34.56	7	12	397	0.015	0.00173205	0.019	0.00173205	0.01	0.001	0.015	0.00360555	1	1.25156	0.660826	0.993742
131	scaffold0378_586227.mRNA1	2,3-bisphosphoglycerate-independent phosphoglycerate mutase like;	5.84/61.39	6.22/65.43	5	16	360	0.026	0.00173205	0.036	0.00360555	0.019	0.001	0.031	0.001	1	1.36426	0.742156	1.19918
132	scaffold0143_850373.mRNA1	Hevamine-A like;	8.07/34.01	7.50/33.68	6	31	450	0.123	0.00458258	0.127	0.0117898	0.069	0.00781025	0.137	0.0121655	1	1.03199	0.562436	1.11249
133	scaffold0753_102318.mRNA1	Hsp70-Hsp90 organizing protein 3 like;	5.94/65.31	6.35/76.32	9	22	559	0.062	0.00173205	0.077	0.00984886	0.042	0.004	0.045	0.002	1	1.23609	0.673671	0.733004
134	scaffold0456_1002067.mRNA1	Fructokinase-2 like;	5.22/35.63	5.16/36.21	5	22	331	0.055	0.00264575	0.065	0.0072111	0.036	0.001	0.045	0.00360555	1	1.18064	0.652893	0.817001
135	scaffold1104_58290.mRNA1	V-type proton ATPase subunit E like;	7.13/26.51	7.80/34.56	8	34	359	0.04	0.0034641	0.041	0.00608276	0.023	0.00608276	0.055	0.00458258	1	1.02564	0.57641	1.36513
136	scaffold0014_190374.mRNA1	Cysteine proteinase inhibitor like;	5.45/11.24	5.00/13.80	5	63	437	0.231	0.00458258	0.179	0.010583	0.102	0.01253	0.125	0.001	1	0.773395	0.443155	0.541377
137	scaffold0156_1465807.mRNA1	Calmodulin-related protein like;	4.11/16.89	3.50/14.86	2	22	157	0.065	0.00360555	0.082	0.003	0.047	0.005	0.126	0.0052915	1	1.26743	0.731305	1.95817
138	scaffold0582_11826.mRNA1	Pyrophosphate--fructose 6-phosphate 1-phosphotransferase subunit beta like;	7.18/62.38	7.28/65.43	10	30	581	0.017	0.00173205	0.02	0.00264575	0.012	0.00264575	0.026	0.001	1	1.16009	0.696056	1.52668
139	scaffold0280_1344905.mRNA1	Dynamin-related protein 4C like;	5.73/74.28	6.03/74.43	9	20	321	0.013	0.00173205	0.018	0.0034641	0.011	0.001	0.016	0.00264575	1	1.31752	0.794466	1.19236
140	scaffold0402_442046.mRNA1	2,3-bisphosphoglycerate-independent phosphoglycerate mutase like;	5.80/61.55	6.06/65.43	5	15	300	0.024	0.001	0.03	0.002	0.019	0.00173205	0.026	0.00360555	1	1.25	0.7775	1.105
141	scaffold0014_3373206.mRNA1	UDP-glucose 6-dehydrogenase 1 like;	5.90/53.49	6.20/55.76	6	22	360	0.025	0.003	0.026	0.00264575	0.016	0.0034641	0.019	0.0034641	1	1.05152	0.660358	0.760252
142	scaffold0233_1484662.mRNA1	26S proteasome non-ATPase regulatory subunit 4 homolog like;	4.57/42.73	4.08/55.76	7	35	494	0.027	0.00173205	0.024	0.0043589	0.015	0.0034641	0.028	0.0034641	1	0.893655	0.563003	1.0277
143	scaffold0347_688965.mRNA1	Annexin D4 like;	7.72/39.54	6.20/35.64	7	27	355	0.068	0.0043589	0.056	0.002	0.036	0.006245	0.072	0.004	1	0.823045	0.529218	1.06008
144	scaffold0786_345204.mRNA1	UTP--glucose-1-phosphate uridylyltransferase like;	6.08/51.66	6.18/53.21	8	24	449	0.044	0.00173205	0.05	0.00781025	0.032	0.006245	0.038	0.00264575	1	1.13766	0.744027	0.875995
145	scaffold0992_72818.mRNA1	Acetyl-CoA acetyltransferase, cytosolic 1 like;	6.54/42.11	7.38/45.65	8	33	819	0.058	0.002	0.059	0.00458258	0.039	0.001	0.052	0.0043589	1	1.00604	0.661972	0.89839
146	scaffold0624_614895.mRNA1	uncharacterized protein	5.74/15.62	7.10/16.32	3	41	372	0.154	0.0101489	0.174	0.00818535	0.115	0.009	0.125	0.006245	1	1.12613	0.747748	0.809685
147	scaffold0198_1471103.mRNA1	Peroxiredoxin-2B like;	5.55/17.54	5.20/17.54	6	55	449	0.161	0.00458258	0.113	0.0101489	0.173	0.00655744	0.141	0.0043589	1	0.705219	1.07687	0.875882
148	scaffold0026_327123.mRNA1	Chlorophyllase type 0 like;	6.30/37.79	7.04/16.00	3	14	173	0.038	0.00264575	0.065	0.0043589	0.107	0.0043589	0.029	0.00264575	1	1.68634	2.79764	0.748735
149	scaffold0912_275877.mRNA1	rhamnose biosynthetic enzyme 1 like;	6.47/34.25	7.26/34.56	8	39	493	0.023	0.00264575	0.015	0.001	0.029	0.00360555	0.022	0.00360555	1	0.669792	1.26256	0.96785
150	scaffold0290_149234.mRNA1	26S proteasome non-ATPase regulatory subunit 14 homolog like;	6.31/34.88	6.82/26.98	7	40	348	0.026	0.00264575	0.024	0.003	0.02	0.003	0.008	0.001	1	0.904977	0.743891	0.304072
151	scaffold1222_136753.mRNA1	Rubber elongation factor protein like;	5.04/14.71	5.04/15.45	3	25	67	0.017	0.015025	0.009	0.001	0.007	0.001	0.004	0.001	1	0.512295	0.427254	0.255635
152	scaffold2538_3915.mRNA1	small rubber particle protein	6.36/27.10	5.95/34.65	6	33	241	0.011	0.002	0.011	0.002	0.014	0.002	0.006	0.001	1	0.968054	1.21297	0.536302
153	scaffold1222_100110.mRNA1	Rubber elongation factor protein like;	5.28/19.61	5.36/23.05	6	33	241	0.032	0.00264575	0.039	0.00264575	0.046	0.00264575	0.024	0.0072111	1	1.2285	1.42752	0.734644
154	scaffold3444_7763.mRNA1	Elicitor-responsive protein 3 like;	4.06/15.25	3.46/47.43	6	84	467	0.167	0.00916515	0.197	0.0087178	0.219	0.0173494	0.121	0.009	1	1.17371	1.31103	0.721831
155	scaffold1479_76107.mRNA1	Acetyl-CoA acetyltransferase, cytosolic 1 like;	6.01/41.65	6.46/45.87	6	29	523	0.117	0.003	0.139	0.00458258	0.114	0.00953939	0.087	0.00984886	1	1.19048	0.97619	0.74881
156	scaffold1375_37486.mRNA1	Profilin-1 like;	4.63/14.24	4.08/13.80	2	29	182	0.231	0.0052915	0.157	0.00818535	0.161	0.007	0.258	0.00781025	1	0.677094	0.693344	1.11043
157	scaffold0434_14371.mRNA1	Glutathione S-transferase F9 like;	8.44/25.50	7.10/23.54	4	30	213	0.087	0.00916515	0.073	0.00360555	0.077	0.00458258	0.119	0.00458258	1	0.831255	0.885287	1.36658
158	scaffold0427_434785.mRNA1	Superoxide dismutase [Mn], mitochondrial like;	7.82/26.15	6.26/23.05	5	37	393	0.072	0.00360555	0.07	0.00888819	0.074	0.004	0.157	0.00458258	1	0.981354	1.02944	2.20118
159	scaffold0168_73087.mRNA1	Abscisic stress-ripening protein 1 like;	6.13/15.80	6.77/22.89	2	24	136	0.011	0.003	0.009	0.001	0.028	0.0034641	0.013	0.00173205	1	0.862694	2.59067	1.16839
160	scaffold0135_1578719.mRNA1	glutathione S-transferase like;	6.23/25.56	5.80/24.61	5	25	267	0.075	0.002	0.075	0.00264575	0.078	0.008544	0.037	0.00360555	1	1.00526	1.05152	0.493165
161	scaffold0299_222985.mRNA1	Aspartic proteinase A1 like	5.03/55.90	5.04/35.64	2	7	211	0.033	0.001	0.027	0.00173205	0.039	0.003	0.019	0.00173205	1	0.829559	1.1919	0.585221
162	scaffold1222_175215.mRNA1	Rubber elongation factor protein like;	5.33/23.62	5.36/24.61	2	13	178	0.053	0.00458258	0.044	0.001	0.068	0.0043589	0.036	0.00264575	1	0.81519	1.26582	0.674684
163	scaffold0888_274749.mRNA1	lactoylglutathione lyase like;	5.06/32.86	4.94/26.64	7	28	380	0.16	0.0052915	0.19	0.00984886	0.238	0.0137477	0.135	0.0105357	1	1.18722	1.48588	0.845468
164	scaffold1102_118530.mRNA1	Proteasome subunit alpha type-2-A like;	5.73/25.61	5.78/26.67	5	26	245	0.116	0.00458258	0.114	0.0072111	0.129	0.00360555	0.083	0.00556776	1	0.98109	1.11235	0.717464
165	scaffold0582_11826.mRNA1	Pyrophosphate--fructose 6-phosphate 1-phosphotransferase subunit beta like;	7.18/62.38	7.67/65.43	7	18	313	0.033	0.00264575	0.026	0.004	0.028	0.00360555	0.042	0.00360555	1	0.781016	0.832639	1.25729
166	scaffold1222_136753.mRNA1	Rubber elongation factor protein like;	5.04/14.71	9.60/13.65	6	63	368	0.063	0.00264575	0.074	0.00173205	0.071	0.00556776	0.11	0.00608276	1	1.17265	1.12108	1.73655
167	scaffold0530_34184.mRNA1	Heat shock 70 kDa protein 5 like;	5.36/72.15	5.32/74.43	8	18	604	0.059	0.004	0.069	0.002	0.059	0.006245	0.094	0.0052915	1	1.16174	0.986193	1.57692
168	scaffold0470_417147.mRNA1	Phosphoinositide phospholipase C 2 like;	5.38/63.74	5.44/66.54	9	24	614	0.064	0.003	0.007	0.001	0.037	0.00173205	0.077	0.00264575	1	1.09398	0.573066	1.18968
169	scaffold0470_417147.mRNA1	Phosphoinositide phospholipase C 2 like;	5.38/63.74	5.40/66.54	8	22	549	0.04	0.0034641	0.04	0.0117898	0.025	0.00360555	0.062	0.005	1	1.0168	0.622278	1.56565

## Sheet: Unique proteins
Table S1-2 The 114 unique proteins information of the 169 differentially expressed protein spots								Vol % of treatment				Ratio of protein abundance
NO.	Accession number	Name	Thero.pI/Mr	Exper. pI/Mr	Mathed peptide number	Sequence coverage %	Mascot score	CK	Eth	Mo	EMo	CK/CK	Eth/CK	Mo/CK	EMo/CK
71	scaffold0005_28735.mRNA1	S-adenosylmethionine synthase 2 like;	5.59/43.54	5.72/49.64	5	18	182	0.015	0.019	0.008	0.012	1	1.253	0.519	0.795
15	scaffold0013_2366000.mRNA1	Annexin-like protein RJ4 like;	7.72/36.06	7.50/35.56	3	11	198	0.043	0.021	0.019	0.022	1	0.485	0.431	0.511
118	scaffold0014_190374.mRNA1	Cysteine proteinase inhibitor like;	5.45/11.24	5.36/14.32	4	42	245	0.112	0.184	0.048	0.106	1	1.65017	0.427393	0.945545
94	scaffold0014_23288.mRNA1	Triosephosphate isomerase, cytosolic like;	5.76/27.53	6.20/26.67	9	45	422	0.191	0.176	0.123	0.179	1	0.922	0.644	0.934
47	scaffold0014_3373206.mRNA1	UDP-glucose 6-dehydrogenase 1 like;	5.90/53.49	5.88/55.76	4	13	256	0.016	0.028	0.02	0.017	1	1.758	1.234	1.089
102	scaffold0017_613025.mRNA1	Cysteine proteinase inhibitor 12 like;	6.87/27.23	7.32/24.61	8	43	671	0.005	0.005	0.036	0.035	1	0.845	6.648	6.548
6	scaffold0026_1110574.mRNA1	Actin-7 like;	5.31/41.89	5.31/93.24	10	40	644	0.013	0.004	0.004	0.007	1	0.286	0.278	0.566
148	scaffold0026_327123.mRNA1	Chlorophyllase type 0 like;	6.30/37.79	7.04/16.00	3	14	173	0.038	0.065	0.107	0.029	1	1.68634	2.79764	0.748735
12	scaffold0029_867537.mRNA1	Universal stress protein A-like protein	5.87/20.17	6.18/21.05	3	19	202	0.036	0.016	0.015	0.024	1	0.449	0.407	0.671
112	scaffold0031_1390956.mRNA1	Malate dehydrogenase, cytoplasmic like;	6.19/36.17	6.40/36.65	4	23	407	0.231	0.268	0.16	0.145	1	1.161	0.936	0.628
97	scaffold0041_2570834.mRNA1	Aspartic proteinase A1 like;	5.73/56.53	5.20/33.68	8	24	606	0.045	0.053	0.03	0.023	1	1.192	0.662	0.512
122	scaffold0047_1944984.mRNA1	SUMO-conjugating enzyme UBC9	7.71/16.75	8.03/15.45	2	25	105	0.066	0.07	0.025	0.042	1	1.06496	0.378062	0.640043
115	scaffold0050_2842364.mRNA1	Cell division cycle protein 48 homolog like;	5.15/90.31	5.22/91.32	10	22	647	0.073	0.075	0.072	0.112	1	1.025	0.986	1.52
62	scaffold0066_550349.mRNA1	prefoldin subunit 5 like;	8.59/17.31	9.20/15.56	5	40	456	0.022	0.016	0.006	0.052	1	0.742	0.29	2.34
13	scaffold0100_712967.mRNA1	Patatin-like protein 2 like;	5.13/49.14	4.56/46.76	4	12	306	0.069	0.031	0.063	0.062	1	0.453	0.0919	0.903
98	scaffold0105_276835.mRNA1	Proteasome subunit beta type-1 like;	6.20/24.88	6.16/24.61	8	52	498	0.048	0.043	0.032	0.045	1	0.898	0.664	0.931
64	scaffold0114_231043.mRNA1	Cysteine synthase like;	6.22/75.28	5.30/34.65	7	16	585	0.022	0.023	0.009	0.005	1	1.039	0.387	0.245
160	scaffold0135_1578719.mRNA1	glutathione S-transferase like;	6.23/25.56	5.80/24.61	5	25	267	0.075	0.075	0.078	0.037	1	1.00526	1.05152	0.493165
96	scaffold0139_994147.mRNA1	Glucose and ribitol dehydrogenase like;	5.29/32.31	5.28/36.87	7	28	478	0.021	0.025	0.014	0.011	1	1.194	0.661	0.512
32	scaffold0143_850373.mRNA1	Hevamine-A like;	8.07/34.01	9.60/33.36	7	39	830	0.071	0.044	0.098	0.037	1	0.614	1.384	0.517
4	scaffold0155_515853.mRNA1	Pro-hevein like;	8.15/23.04	5.20/17.54	2	18	211	0.036	0.01	0.041	0.03	1	0.273	1.124	0.817
137	scaffold0156_1465807.mRNA1	Calmodulin-related protein like;	4.11/16.89	3.50/14.86	2	22	157	0.065	0.082	0.047	0.126	1	1.26743	0.731305	1.95817
40	scaffold0166_1819893.mRNA1	Uncharacterized protein Os08g0359500 like;	5.37/12.86	5.34/14.71	2	22	129	0.402	0.817	0.623	0.843	1	2.034	1.551	2.1
159	scaffold0168_73087.mRNA1	Abscisic stress-ripening protein 1 like;	6.13/15.80	6.77/22.89	2	24	136	0.011	0.009	0.028	0.013	1	0.862694	2.59067	1.16839
106	scaffold0178_730225.mRNA1	aldo-keto reductase 2 like;	6.03/37.98	6.25/36.53	4	12	250	0.026	0.03	0.018	0.015	1	1.169	0.69	0.575
93	scaffold0195_965653.mRNA1	UDP-arabinopyranose mutase 3 like;	5.76/41.80	5.87/45.54	4	12	122	0.033	0.039	0.021	0.029	1	1.184	0.644	0.859
72	scaffold0197_1256978.mRNA1	Glutathione S-transferase like;	5.81/24.00	6.10/24.00	6	42	259	0.022	0.015	0.011	0.015	1	0.673	0.524	0.684
67	scaffold0197_1486649.mRNA1	Uncharacterized protein Os08g0359500 like;	4.48/20.46	4.00/24.58	4	29	235	0.028	0.03	0.013	0.013	1	1.064	0.453	0.46
147	scaffold0198_1471103.mRNA1	Peroxiredoxin-2B like;	5.55/17.54	5.20/17.54	6	55	449	0.161	0.113	0.173	0.141	1	0.705219	1.07687	0.875882
9	scaffold0217_269209.mRNA1	uncharacterized protein	9.49/20.42	9.17/16.56	4	30	180	0.159	0.049	0.091	0.054	1	0.311	0.574	0.338
142	scaffold0233_1484662.mRNA1	26S proteasome non-ATPase regulatory subunit 4 homolog like;	4.57/42.73	4.08/55.76	7	35	494	0.027	0.024	0.015	0.028	1	0.893655	0.563003	1.0277
119	scaffold0239_773114.mRNA1	prefoldin subunit 4 like;	4.45/14.56	3.90/17.54	3	31	229	0.014	0.013	0.004	0.01	1	0.909091	0.274545	0.684545
56	scaffold0280_1322570.mRNA1	Dynamin-related protein 4C like;	5.91/74.32	6.44/74.43	9	16	538	0.03	0.046	0.028	0.036	1	1.509	0.904	1.179
139	scaffold0280_1344905.mRNA1	Dynamin-related protein 4C like;	5.73/74.28	6.03/74.43	9	20	321	0.013	0.018	0.011	0.016	1	1.31752	0.794466	1.19236
100	scaffold0283_54035.mRNA1	GEM-like protein 5 like;	6.55/29.28	7.20/34.56	6	42	369	0.02	0.02	0.033	0.026	1	0.993	1.68	1.346
150	scaffold0290_149234.mRNA1	26S proteasome non-ATPase regulatory subunit 14 homolog like;	6.31/34.88	6.82/26.98	7	40	348	0.026	0.024	0.02	0.008	1	0.904977	0.743891	0.304072
161	scaffold0299_222985.mRNA1	Aspartic proteinase A1 like	5.03/55.90	5.04/35.64	2	7	211	0.033	0.027	0.039	0.019	1	0.829559	1.1919	0.585221
104	scaffold0307_1066072.mRNA1	Proteasome subunit beta type-2-A like;	5.85/22.73	6.00/23.05	7	45	529	0.032	0.031	0.025	0.017	1	0.973	0.764	0.512
21	scaffold0331_686228.mRNA1	Vacuolar protein sorting-associated protein 2 homolog 1 like;	5.55/25.16	5.84/34.23	4	20	231	0.007	0.004	0.011	0.008	1	0.532	1.585	1.125
55	scaffold0331_834438.mRNA1	Phospholipase D alpha 1 like;	5.60/88.90	6.00/88.90	9	17	487	0.018	0.028	0.023	0.034	1	1.512	1.231	1.878
116	scaffold0333_708001.mRNA1	Natterin-4 like;	5.86/54.25	5.94/66.54	10	30	517	0.011	0.013	0.008	0.019	1	1.197	0.758	1.764
66	scaffold0340_174387.mRNA1	Malignant T-cell-amplified sequence 1 like;	8.46/20.28	8.90/22.89	7	49	341	0.011	0.012	0.005	0.023	1	1.138	0.45	2.206
75	scaffold0344_256841.mRNA1	18.5 kDa class I heat shock protein like;	5.97/18.06	6.10/17.67	4	26	176	0.045	0.046	0.024	0.039	1	1.02	0.53	0.879
143	scaffold0347_688965.mRNA1	Annexin D4 like;	7.72/39.54	6.20/35.64	7	27	355	0.068	0.056	0.036	0.072	1	0.823045	0.529218	1.06008
105	scaffold0356_425272.mRNA1	DnaJ protein homolog like;	6.04/77.568	7.08/49.87	7	17	499	0.035	0.032	0.025	0.02	1	0.914	0.725	0.566
25	scaffold0370_918136.mRNA1	Proteasome subunit beta type-4 like;	6.97/27.90	8.30/24.61	9	55	823	0.033	0.018	0.03	0.003	1	0.553	0.915	0.093
131	scaffold0378_586227.mRNA1	2,3-bisphosphoglycerate-independent phosphoglycerate mutase like;	5.84/61.39	6.22/65.43	5	16	360	0.026	0.036	0.019	0.031	1	1.36426	0.742156	1.19918
69	scaffold0387_85080.mRNA1	Macro domain-containing protein VPA0103 like	7.67/29.50	5.15/3.54	4	19	170	0.076	0.078	0.038	0.044	1	1.025	0.498	0.587
140	scaffold0402_442046.mRNA1	2,3-bisphosphoglycerate-independent phosphoglycerate mutase like;	5.80/61.55	6.06/65.43	5	15	300	0.024	0.03	0.019	0.026	1	1.25	0.7775	1.105
158	scaffold0427_434785.mRNA1	Superoxide dismutase [Mn], mitochondrial like;	7.82/26.15	6.26/23.05	5	37	393	0.072	0.07	0.074	0.157	1	0.981354	1.02944	2.20118
95	scaffold0434_14371.mRNA1	Glutathione S-transferase F9 like;	8.44/25.50	7.40/23.54	7	39	645	0.177	0.141	0.115	0.156	1	0.797	0.652	0.882
53	scaffold0438_1023124.mRNA1	phosphatase SPAC5H10.03 like;	7.07/31.33	6.54/33.68	7	27	454	0.034	0.052	0.043	0.036	1	1.542	1.274	1.081
60	scaffold0444_175845.mRNA1	Ubiquitin-conjugating enzyme E2 35 like;	6.74/17.27	6.73/15.45	6	58	389	0.033	0.026	0.007	0.009	1	0.792	0.225	0.265
83	scaffold0444_830660.mRNA1	Alcohol dehydrogenase class-3 like;	7.49/41.71	7.16/47.41	4	20	233	0.072	0.067	0.042	0.072	1	0.934	0.576	1.003
126	scaffold0456_1002067.mRNA1	Fructokinase-2 like;	5.22/35.63	5.35/36.21	4	18	318	0.023	0.032	0.015	0.016	1	1.38889	0.6625	0.705556
49	scaffold0457_538964.mRNA1	Alpha-soluble NSF attachment protein 2 like;	5.05/32.77	4.98/34.23	6	30	401	0.04	0.06	0.047	0.032	1	1.622	1.18	0.804
168	scaffold0470_417147.mRNA1	Phosphoinositide phospholipase C 2 like;	5.38/63.74	5.44/66.54	9	24	614	0.064	0.007	0.037	0.077	1	1.09398	0.573066	1.18968
16	scaffold0479_272073.mRNA1	Obg-like ATPase 1 like;	6.62/44.94	7.52/47.43	9	35	689	0.027	0.014	0.016	0.015	1	0.498	0.574	0.536
33	scaffold0491_874744.mRNA1	Elongation factor 1-delta like;	4.51/25.91	4.02/35.68	5	31	192	0.035	0.022	0.007	0.016	1	0.615	0.201	0.455
167	scaffold0530_34184.mRNA1	Heat shock 70 kDa protein 5 like;	5.36/72.15	5.32/74.43	8	18	604	0.059	0.069	0.059	0.094	1	1.16174	0.986193	1.57692
109	scaffold0548_575390.mRNA1	Stem-specific protein TSJT1 like;	5.56/27.27	5.05/36.64	7	33	373	0.028	0.022	0.022	0.017	1	0.812	0.785	0.607
113	scaffold0558_100711.mRNA1	ATP-citrate synthase alpha chain protein 2 like;	5.89/57.30	6.08/49.87	7	27	479	0.015	0.017	0.011	0.01	1	1.107	0.0739	0.646
27	scaffold0564_474434.mRNA1	uncharacterized protein	4.17/33.89	3.42/65.32	6	33	360	0.057	0.033	0.037	0.039	1	0.58	0.643	0.687
138	scaffold0582_11826.mRNA1	Pyrophosphate--fructose 6-phosphate 1-phosphotransferase subunit beta like;	7.18/62.38	7.28/65.43	10	30	581	0.017	0.02	0.012	0.026	1	1.16009	0.696056	1.52668
123	scaffold0592_368115.mRNA1	Ankyrin repeat domain-containing protein 2 like;	4.50/37.71	4.06/43.21	7	30	341	0.161	0.134	0.053	0.12	1	0.829187	0.328358	0.742952
77	scaffold0618_714426.mRNA1	Beta-glucosidase 42 like;	5.49/56.73	5.60/65.03	5	15	263	0.038	0.039	0.02	0.035	1	1.038	0.535	0.923
146	scaffold0624_614895.mRNA1	uncharacterized protein	5.74/15.62	7.10/16.32	3	41	372	0.154	0.174	0.115	0.125	1	1.12613	0.747748	0.809685
44	scaffold0625_1132.mRNA1	Glucan endo-1,3-beta-glucosidase, basic vacuolar isoform like;	7.77/41.18	9.42/36.64	8	37	764	0.242	0.224	0.083	0.187	1	0.928	0.344	0.775
20	scaffold0625_11329.mRNA1	Glucan endo-1,3-beta-glucosidase, basic vacuolar isoform like;	9.27/41.51	9.60/39.45	9	41	1073	0.234	0.122	0.368	0.175	1	0.524	1.576	0.751
26	scaffold0625_426005.mRNA1	Acylpyruvase FAHD1, mitochondrial like	6.52/24.25	7.20/24.61	4	30	382	0.033	0.019	0.058	0.054	1	0.566	1.765	1.657
68	scaffold0625_591792.mRNA1	Translationally-controlled tumor protein homolog like;	4.47/19.16	4.05/19.54	6	64	505	0.196	0.166	0.09	0.126	1	0.847	0.458	0.645
35	scaffold0645_687748.mRNA1	18.5 kDa class I heat shock protein like;	6.00/18.33	6.20/19.17	5	43	420	0.058	0.038	0.035	0.036	1	0.646	0.607	0.625
61	scaffold0664_98467.mRNA1	Caffeic acid 3-O-methyltransferase like;	5.54/36.83	5.82/37.67	6	29	456	0.015	0.018	0.004	0.013	1	1.239	0.253	0.907
101	scaffold0677_448742.mRNA1	Proteasome subunit alpha type-5 like;	4.70/26.16	4.22/26.16	6	41	410	0.041	0.053	0.101	0.04	1	1.282	2.464	0.966
120	scaffold0677_45450.mRNA1	carboxylesterase 6 like;	5.03/37.61	5.03/36.06	7	29	329	0.011	0.013	0.004	0.009	1	1.12233	0.342312	0.790123
39	scaffold0686_576053.mRNA1	pyridoxal biosynthesis protein PDX1 like;	6.26/33.40	6.70/35.43	5	27	162	0.017	0.037	0.071	0.017	1	2.164	4.163	1.027
1	scaffold0698_149194.mRNA1	uncharacterized protein	4.17/29.87	3.50/50.32	2	8	98	0.024	0.003	0.006	0.007	1	0.13	0.233	0.273
103	scaffold0716_566809.mRNA1	Proteasome subunit beta type-4 like;	6.32/27.80	7.84/24.61	6	36	545	0.019	0.015	0.016	0.008	1	0.773	0.826	0.395
28	scaffold0745_297880.mRNA1	Elongation factor 1-alpha like;	9.20/49.75	9.70/51.54	3	10	136	0.031	0.018	0.023	0.02	1	0.588	0.731	0.623
89	scaffold0753_102318.mRNA1	Hsp70-Hsp90 organizing protein 3 like;	5.94/65.31	6.14/76.45	9	20	394	0.019	0.019	0.012	0.017	1	0.991	0.629	0.894
90	scaffold0768_534911.mRNA1	Desiccation protectant protein Lea14 homolog like;	4.71/35.06	4.50/36.53	7	34	450	0.076	0.06	0.048	0.051	1	0.788	0.633	0.675
144	scaffold0786_345204.mRNA1	UTP--glucose-1-phosphate uridylyltransferase like;	6.08/51.66	6.18/53.21	8	24	449	0.044	0.05	0.032	0.038	1	1.13766	0.744027	0.875995
42	scaffold0878_145544.mRNA1	Importin subunit alpha-1 like;	2.28/59.16	5.30/65.03	4	11	123	0.016	0.032	0.016	0.014	1	1.958	0.961	0.863
51	scaffold0884_428899.mRNA1	Triosephosphate isomerase, cytosolic like;	5.90/27.57	6.50/26.87	7	32	451	0.041	0.064	0.05	0.044	1	1.559	1.21	1.061
163	scaffold0888_274749.mRNA1	lactoylglutathione lyase like;	5.06/32.86	4.94/26.64	7	28	380	0.16	0.19	0.238	0.135	1	1.18722	1.48588	0.845468
3	scaffold0901_132647.mRNA1	ADP-ribosylation factor GTPase-activating protein AGD13 like;	5.14/19.416	5.12/19.53	5	55	467	0.031	0.007	0.045	0.036	1	0.222	1.448	1.172
91	scaffold0912_144680.mRNA1	Ankyrin repeat domain-containing protein 2 like;	4.50/37.64	4.03/36.53	3	11	168	0.095	0.086	0.061	0.082	1	0.914	0.641	0.863
149	scaffold0912_275877.mRNA1	rhamnose biosynthetic enzyme 1 like;	6.47/34.25	7.26/34.56	8	39	493	0.023	0.015	0.029	0.022	1	0.669792	1.26256	0.96785
34	scaffold0935_348908.mRNA1	Proteasome subunit beta type-5 like;	5.86/29.35	8.03/24.58	6	37	472	0.048	0.03	0.054	0.021	1	0.625	1.122	0.445
8	scaffold0944_314376.mRNA1	Glutathione S-transferase PARB like;	6.31/23.87	6.85/23.54	5	36	317	0.023	0.007	0.013	0.009	1	0.3	0.584	0.386
86	scaffold0947_141222.mRNA1	Serpin-ZX like;	5.94/42.82	6.20/43.21	3	13	262	0.115	0.122	0.072	0.102	1	1.058	0.622	0.884
145	scaffold0992_72818.mRNA1	Acetyl-CoA acetyltransferase, cytosolic 1 like;	6.54/42.11	7.38/45.65	8	33	819	0.058	0.059	0.039	0.052	1	1.00604	0.661972	0.89839
127	scaffold1032_279744.mRNA1	Urease accessory protein G like;	7.02/57.30	6.42/26.64	6	20	305	0.012	0.008	0.004	0.008	1	0.706215	0.342514	0.694209
19	scaffold1093_209300.mRNA1	Pro-hevein like;	6.79/11.84	8.60/15.65	2	36	250	0.12	0.0652	0.145	0.083	1	0.519	1.215	0.694
10	scaffold1093_241290.mRNA1	Pro-hevein like;	8.12/23.45	8.12/19.65	3	26	263	0.131	0.053	0.137	0.114	1	0.41	1.049	0.873
164	scaffold1102_118530.mRNA1	Proteasome subunit alpha type-2-A like;	5.73/25.61	5.78/26.67	5	26	245	0.116	0.114	0.129	0.083	1	0.98109	1.11235	0.717464
135	scaffold1104_58290.mRNA1	V-type proton ATPase subunit E like;	7.13/26.51	7.80/34.56	8	34	359	0.04	0.041	0.023	0.055	1	1.02564	0.57641	1.36513
2	scaffold1173_171897.mRNA1	Aldose 1-epimerase like;	5.70/36.96	5.80/37.01	4	23	127	0.013	0.002	0.008	0.002	1	0.149	0.613	0.183
36	scaffold1194_13551.mRNA1	(+)-neomenthol dehydrogenase like;	7.08/88.35	5.54/34.56	6	10	332	0.026	0.017	0.033	0.018	1	0.649	1.291	0.721
37	scaffold1220_115657.mRNA1	ATP-citrate synthase beta chain protein 1 like;	7.95/66.48	7.96/65.43	4	10	263	0.019	0.012	0.023	0.02	1	0.658	1.222	1.101
153	scaffold1222_100110.mRNA1	Rubber elongation factor protein like;	5.28/19.61	5.36/23.05	6	33	241	0.032	0.039	0.046	0.024	1	1.2285	1.42752	0.734644
46	scaffold1222_136753.mRNA1	Rubber elongation factor protein like;	5.04/14.71	9.80/14.71	6	55	449	0.302	0.544	0.447	0.391	1	1.802	1.478	1.295
162	scaffold1222_175215.mRNA1	Rubber elongation factor protein like;	5.33/23.62	5.36/24.61	2	13	178	0.053	0.044	0.068	0.036	1	0.81519	1.26582	0.674684
156	scaffold1375_37486.mRNA1	Profilin-1 like;	4.63/14.24	4.08/13.80	2	29	182	0.231	0.157	0.161	0.258	1	0.677094	0.693344	1.11043
117	scaffold1413_46445.mRNA1	Cell division cycle protein 48 homolog like;	5.33/93.90	5.40/91.32	10	20	603	0.016	0.016	0.022	0.033	1	1.028	1.379	2.048
45	scaffold1465_23608.mRNA1	5-methyltetrahydropteroyltriglutamate--homocysteine methyltransferase like;	6.30/85.15	6.88/85.15	7	16	558	0.008	0.014	0.01	0.013	1	1.811	1.324	1.662
52	scaffold1479_76107.mRNA1	Acetyl-CoA acetyltransferase, cytosolic 1 like;	6.01/41.65	6.10/47.43	4	20	299	0.012	0.018	0.009	0.01	1	1.559	0.741	0.816
23	scaffold1735_70085.mRNA1	ricin B-like lectin EULS3	7.77/20.72	8.22/20.65	8	55	425	0.048	0.026	0.04	0.034	1	0.538	0.821	0.704
70	scaffold1772_2818.mRNA1	universal stress protein PHOS32	7.70/22.50	6.24/19.27	6	45	470	0.035	0.037	0.018	0.034	1	1.072	0.509	0.975
121	scaffold1789_16143.mRNA1	Cyclase-associated protein 1 like;	6.64/51.99	6.75/55.76	7	20	212	0.014	0.019	0.007	0.015	1	1.2987	0.457143	1.02597
124	scaffold2041_42337.mRNA1	calcium-binding protein CML49 like;	7.48/31.74	6.98/26.64	3	14	205	0.023	0.021	0.009	0.024	1	0.912409	0.375912	1.00547
152	scaffold2538_3915.mRNA1	small rubber particle protein	6.36/27.10	5.95/34.65	6	33	241	0.011	0.011	0.014	0.006	1	0.968054	1.21297	0.536302
154	scaffold3444_7763.mRNA1	Elicitor-responsive protein 3 like;	4.06/15.25	3.46/47.43	6	84	467	0.167	0.197	0.219	0.121	1	1.17371	1.31103	0.721831
58	scaffold4512_855.mRNA1	Osmotin-like protein OSM34 like;	5.23/27.68	6.22/22.32	4	30	348	0.082	0.09	0.01	0.036	1	1.101	0.121	0.444

## Sheet: mean of the column heading
Table S1-3 meaning of the column headings of Table S1-2
column heading	mean of the column heading
NO.	The number of the identified proteins on the gel
Accession number	The accession number of the identified protein in database
Name	Name of the identified protein
Thero.pI/Mr	The theoretical isoelectric point and molecular weight of identified protein
Exper. pI/Mr	The expriment isoelectric point and molecular weight of identified protein
Mathed peptide number	The number of matched peptides from identified protein.
Sequence coverage %	The percentage of the matched peptides in the identified protein.
Mascot score	The score of protein database search after MALDI TOF/TOF MS
CK	This column mean the protein abudance on the CK gel (Vol%)
Eth	This column mean the protein abudance on the Eth gel (Vol%)
Mo	This column mean the protein abudance on the Mo gel (Vol%)
EMo	This column mean the protein abudance on the EMo gel (Vol%)
±SD	The standard deviation of the protein abudance in the treatment
CK/CK	The ratio of the protein abudance with CK
Eth/CK	The ratio of the protein abudance with CK
Mo/CK	The ratio of the protein abudance with CK
EMo/CK	The ratio of the protein abudance with CK
