# Supplementary material for: Physiological and Proteomic Analyses of Molybdenum- and Ethylene-Responsive Mechanisms in Rubber Latex
Source: Front Plant Sci. 2018 May 15;9:621. doi: 10.3389/fpls.2018.00621 (PMC5962772; doi:10.3389/fpls.2018.00621)
Supplement: TABLE S2 — Functional analysis of the identified DEPs in rubber latex. [file Table_2.XLSX]

## Sheet: GO-enrichment
Table S2-1 GO information of the 114 unique proteins obtained by Blast2go
Level	GO ID	GO Name	GO Type	Parents (ACC)	Parents (Name)	Nodescore	#Seqs	Sequence Names
3	GO:0009056	catabolic process	Biological Process	GO:0008152	metabolic process	7.73	22	lcl|scaffold0716_566809.mRNA1.1, lcl|scaffold0378_586227.mRNA1, lcl|scaffold0026_327123.mRNA1, lcl|scaffold0331_834438.mRNA1, lcl|scaffold0654_72554.mRNA1, lcl|scaffold0884_428899.mRNA1, lcl|scaffold0307_1066072.mRNA1, lcl|scaffold0677_448742.mRNA1, lcl|scaffold0370_918136.mRNA1, lcl|scaffold0143_850373.mRNA1, lcl|scaffold0470_417147.mRNA1, lcl|scaffold0105_276835.mRNA1.1, lcl|scaffold0582_11826.…
3	GO:0042221	response to chemical	Biological Process	GO:0050896	response to stimulus	3.35	9	lcl|scaffold0347_688965.mRNA1, lcl|scaffold0052_812663.mRNA1, lcl|scaffold5118_868.mRNA1, lcl|scaffold0654_72554.mRNA1, lcl|scaffold0283_54035.mRNA1.1, lcl|scaffold1257_162662.mRNA1, lcl|scaffold0582_11826.mRNA1, lcl|scaffold0198_1471103.mRNA1, lcl|scaffold0427_434785.mRNA1
3	GO:0044710	single-organism metabolic process	Biological Process	GO:0008152, GO:0044699	metabolic process, single-organism process	18.48	31	lcl|scaffold0444_830660.mRNA1, lcl|scaffold0378_586227.mRNA1, lcl|scaffold0026_327123.mRNA1, lcl|scaffold0331_834438.mRNA1, lcl|scaffold0884_428899.mRNA1, lcl|scaffold0530_34184.mRNA1, lcl|scaffold0582_11826.mRNA1, lcl|scaffold0618_714426.mRNA1, lcl|scaffold0052_812663.mRNA1, lcl|scaffold0402_442046.mRNA1, lcl|scaffold0100_712967.mRNA1, lcl|scaffold0135_1578719.mRNA1, lcl|scaffold2412_20192.mRNA1…
3	GO:0071704	organic substance metabolic process	Biological Process	GO:0008152	metabolic process	29.97	51	lcl|scaffold1222_136753.mRNA1, lcl|scaffold0444_830660.mRNA1, lcl|scaffold0625_1132.mRNA1, lcl|scaffold0026_327123.mRNA1, lcl|scaffold0947_141222.mRNA1, lcl|scaffold0884_428899.mRNA1, lcl|scaffold0370_918136.mRNA1, lcl|scaffold0618_714426.mRNA1, lcl|scaffold0402_442046.mRNA1, lcl|scaffold0100_712967.mRNA1, lcl|scaffold0135_1578719.mRNA1, lcl|scaffold0625_11329.mRNA1, lcl|scaffold1494_91146.mRNA1.…
3	GO:0044763	single-organism cellular process	Biological Process	GO:0009987, GO:0044699	cellular process, single-organism process	6.77	24	lcl|scaffold0378_586227.mRNA1, lcl|scaffold0026_327123.mRNA1, lcl|scaffold0331_834438.mRNA1, lcl|scaffold0884_428899.mRNA1, lcl|scaffold0582_11826.mRNA1, lcl|scaffold0052_812663.mRNA1, lcl|scaffold0402_442046.mRNA1, lcl|scaffold0457_538964.mRNA1, lcl|scaffold0135_1578719.mRNA1, lcl|scaffold2412_20192.mRNA1, lcl|scaffold0198_1471103.mRNA1, lcl|scaffold0654_72554.mRNA1, lcl|scaffold0548_575390.mRNA…
3	GO:0006950	response to stress	Biological Process	GO:0050896	response to stimulus	23.14	15	lcl|scaffold0625_1132.mRNA1, lcl|scaffold5118_868.mRNA1, lcl|scaffold0654_72554.mRNA1, lcl|scaffold1093_241290.mRNA1, lcl|scaffold1478_6002.mRNA1, lcl|scaffold0427_434785.mRNA1, lcl|scaffold0347_688965.mRNA1, lcl|scaffold0052_812663.mRNA1, lcl|scaffold0356_425272.mRNA1, lcl|scaffold0625_11329.mRNA1, lcl|scaffold0168_73087.mRNA1, lcl|scaffold0624_614895.mRNA1, lcl|scaffold1772_2818.mRNA1, lcl|scaf…
3	GO:0044238	primary metabolic process	Biological Process	GO:0008152	metabolic process	31.2	44	lcl|scaffold1222_136753.mRNA1, lcl|scaffold0625_1132.mRNA1, lcl|scaffold0378_586227.mRNA1, lcl|scaffold0947_141222.mRNA1, lcl|scaffold0331_834438.mRNA1, lcl|scaffold0884_428899.mRNA1, lcl|scaffold0370_918136.mRNA1, lcl|scaffold0582_11826.mRNA1, lcl|scaffold0105_276835.mRNA1.1, lcl|scaffold0618_714426.mRNA1, lcl|scaffold0402_442046.mRNA1, lcl|scaffold0100_712967.mRNA1, lcl|scaffold1494_91146.mRNA1…
3	GO:0044237	cellular metabolic process	Biological Process	GO:0008152, GO:0009987	metabolic process, cellular process	12.96	43	lcl|scaffold1222_136753.mRNA1, lcl|scaffold0378_586227.mRNA1, lcl|scaffold0026_327123.mRNA1, lcl|scaffold0947_141222.mRNA1, lcl|scaffold0331_834438.mRNA1, lcl|scaffold0884_428899.mRNA1, lcl|scaffold0370_918136.mRNA1, lcl|scaffold0582_11826.mRNA1, lcl|scaffold0105_276835.mRNA1.1, lcl|scaffold0618_714426.mRNA1, lcl|scaffold0197_1256978.mRNA1, lcl|scaffold0052_812663.mRNA1, lcl|scaffold0402_442046.m…
3	GO:0050794	regulation of cellular process	Biological Process	GO:0050789, GO:0009987	regulation of biological process, cellular process	1.91	8	lcl|scaffold0052_812663.mRNA1, lcl|scaffold1375_37486.mRNA1, lcl|scaffold0947_141222.mRNA1, lcl|scaffold0356_425272.mRNA1, lcl|scaffold0017_613025.mRNA1, lcl|scaffold0014_190374.mRNA1.1, lcl|scaffold0470_417147.mRNA1, lcl|scaffold0198_1471103.mRNA1
3	GO:0009058	biosynthetic process	Biological Process	GO:0008152	metabolic process	2.94	15	lcl|scaffold1222_136753.mRNA1, lcl|scaffold0548_575390.mRNA1, lcl|scaffold1465_23608.mRNA1, lcl|scaffold1222_175215.mRNA1, lcl|scaffold0356_425272.mRNA1, lcl|scaffold2412_20192.mRNA1, lcl|scaffold0972_315563.mRNA1, lcl|scaffold2538_3915.mRNA1, lcl|scaffold0005_28735.mRNA1, lcl|scaffold0491_874744.mRNA1, lcl|scaffold0114_231043.mRNA1, lcl|scaffold0195_965653.mRNA1, lcl|scaffold0014_23288.mRNA1, lc…
3	GO:0006807	nitrogen compound metabolic process	Biological Process	GO:0008152	metabolic process	32.46	27	lcl|scaffold1222_136753.mRNA1, lcl|scaffold0378_586227.mRNA1, lcl|scaffold0026_327123.mRNA1, lcl|scaffold0331_834438.mRNA1, lcl|scaffold0884_428899.mRNA1, lcl|scaffold0582_11826.mRNA1, lcl|scaffold0197_1256978.mRNA1, lcl|scaffold0402_442046.mRNA1, lcl|scaffold0135_1578719.mRNA1, lcl|scaffold2412_20192.mRNA1, lcl|scaffold2538_3915.mRNA1, lcl|scaffold1032_279744.mRNA1, lcl|scaffold0944_314376.mRNA1…
Level	GO ID	GO Name	GO Type	Parents (ACC)	Parents (Name)	Nodescore	#Seqs	Sequence Names
3	GO:0016740	transferase activity	Molecular Function	GO:0003824	catalytic activity	24.84	20	lcl|scaffold1220_115657.mRNA1, lcl|scaffold0456_1002067.mRNA1, lcl|scaffold0947_141222.mRNA1, lcl|scaffold0654_72554.mRNA1, lcl|scaffold0992_72818.mRNA1, lcl|scaffold0786_345204.mRNA1, lcl|scaffold0582_11826.mRNA1, lcl|scaffold1465_23608.mRNA1, lcl|scaffold0197_1256978.mRNA1, lcl|scaffold1479_76107.mRNA1, lcl|scaffold0664_98467.mRNA1, lcl|scaffold0135_1578719.mRNA1, lcl|scaffold0434_14371.mRNA1, …
3	GO:0097159	organic cyclic compound binding	Molecular Function	GO:0005488	binding	8.07	23	lcl|scaffold1222_136753.mRNA1, lcl|scaffold0554_569198.mRNA1, lcl|scaffold0654_72554.mRNA1, lcl|scaffold0164_663082.mRNA1, lcl|scaffold0530_34184.mRNA1, lcl|scaffold0340_174387.mRNA1, lcl|scaffold0137_967149.mRNA1, lcl|scaffold0280_1322570.mRNA1, lcl|scaffold0582_11826.mRNA1, lcl|scaffold0558_100711.mRNA1, lcl|scaffold1494_91146.mRNA1.1, lcl|scaffold1222_175215.mRNA1, lcl|scaffold0356_425272.mRNA…
3	GO:0036094	small molecule binding	Molecular Function	GO:0005488	binding	2.53	15	lcl|scaffold0554_569198.mRNA1, lcl|scaffold0654_72554.mRNA1, lcl|scaffold0164_663082.mRNA1, lcl|scaffold0530_34184.mRNA1, lcl|scaffold0137_967149.mRNA1, lcl|scaffold0280_1322570.mRNA1, lcl|scaffold0582_11826.mRNA1, lcl|scaffold0558_100711.mRNA1, lcl|scaffold0356_425272.mRNA1, lcl|scaffold0972_315563.mRNA1, lcl|scaffold0479_272073.mRNA1.1, lcl|scaffold0280_1344905.mRNA1, lcl|scaffold0005_28735.mRN…
3	GO:0043167	ion binding	Molecular Function	GO:0005488	binding	11.79	28	lcl|scaffold0444_830660.mRNA1, lcl|scaffold0378_586227.mRNA1, lcl|scaffold0331_834438.mRNA1, lcl|scaffold0530_34184.mRNA1, lcl|scaffold0888_274749.mRNA1, lcl|scaffold0582_11826.mRNA1, lcl|scaffold0558_100711.mRNA1, lcl|scaffold0402_442046.mRNA1, lcl|scaffold2412_20192.mRNA1, lcl|scaffold0479_272073.mRNA1.1, lcl|scaffold0280_1344905.mRNA1, lcl|scaffold1032_279744.mRNA1, lcl|scaffold0451_534194.mRN…
3	GO:0097367	carbohydrate derivative binding	Molecular Function	GO:0005488	binding	4.21	17	lcl|scaffold0554_569198.mRNA1, lcl|scaffold0654_72554.mRNA1, lcl|scaffold0530_34184.mRNA1, lcl|scaffold1093_241290.mRNA1, lcl|scaffold1478_6002.mRNA1, lcl|scaffold0143_850373.mRNA1, lcl|scaffold0280_1322570.mRNA1, lcl|scaffold0582_11826.mRNA1, lcl|scaffold0558_100711.mRNA1, lcl|scaffold0356_425272.mRNA1, lcl|scaffold0972_315563.mRNA1, lcl|scaffold0479_272073.mRNA1.1, lcl|scaffold0280_1344905.mRNA…
3	GO:0016787	hydrolase activity	Molecular Function	GO:0003824	catalytic activity	42.94	32	lcl|scaffold0625_1132.mRNA1, lcl|scaffold0026_327123.mRNA1, lcl|scaffold0947_141222.mRNA1, lcl|scaffold0331_834438.mRNA1, lcl|scaffold0370_918136.mRNA1, lcl|scaffold0105_276835.mRNA1.1, lcl|scaffold0618_714426.mRNA1, lcl|scaffold1104_58290.mRNA1, lcl|scaffold0100_712967.mRNA1, lcl|scaffold0625_11329.mRNA1, lcl|scaffold0017_613025.mRNA1, lcl|scaffold1151_1703.mRNA1.1, lcl|scaffold0479_272073.mRNA1…
3	GO:1901363	heterocyclic compound binding	Molecular Function	GO:0005488	binding	8.07	23	lcl|scaffold1222_136753.mRNA1, lcl|scaffold0554_569198.mRNA1, lcl|scaffold0654_72554.mRNA1, lcl|scaffold0164_663082.mRNA1, lcl|scaffold0530_34184.mRNA1, lcl|scaffold0340_174387.mRNA1, lcl|scaffold0137_967149.mRNA1, lcl|scaffold0280_1322570.mRNA1, lcl|scaffold0582_11826.mRNA1, lcl|scaffold0558_100711.mRNA1, lcl|scaffold1494_91146.mRNA1.1, lcl|scaffold1222_175215.mRNA1, lcl|scaffold0356_425272.mRNA…
3	GO:0005515	protein binding	Molecular Function	GO:0005488	binding	28.21	20	lcl|scaffold0592_368115.mRNA1.1, lcl|scaffold0912_144680.mRNA1, lcl|scaffold0654_72554.mRNA1, lcl|scaffold0290_149234.mRNA1, lcl|scaffold0548_575390.mRNA1, lcl|scaffold0753_102318.mRNA1, lcl|scaffold0197_1256978.mRNA1, lcl|scaffold1375_37486.mRNA1, lcl|scaffold0239_773114.mRNA1, lcl|scaffold0457_538964.mRNA1, lcl|scaffold0664_98467.mRNA1, lcl|scaffold0135_1578719.mRNA1, lcl|scaffold0356_425272.mR…
3	GO:0016491	oxidoreductase activity	Molecular Function	GO:0003824	catalytic activity	5.6	11	lcl|scaffold0052_812663.mRNA1, lcl|scaffold0178_966317.mRNA1, lcl|scaffold0444_830660.mRNA1, lcl|scaffold0139_994147.mRNA1, lcl|scaffold0164_663082.mRNA1, lcl|scaffold0530_34184.mRNA1, lcl|scaffold1194_13551.mRNA1, lcl|scaffold0137_967149.mRNA1, lcl|scaffold0031_1390956.mRNA1, lcl|scaffold0198_1471103.mRNA1, lcl|scaffold0427_434785.mRNA1
Level	GO ID	GO Name	GO Type	Parents (ACC)	Parents (Name)	Nodescore	#Seqs	Sequence Names
3	GO:1902494	catalytic complex	Cellular Component	GO:0032991	macromolecular complex	3.27	10	lcl|scaffold0716_566809.mRNA1.1, lcl|scaffold1357_73336.mRNA1, lcl|scaffold0233_1484662.mRNA1, lcl|scaffold0654_72554.mRNA1, lcl|scaffold0290_149234.mRNA1, lcl|scaffold0677_448742.mRNA1, lcl|scaffold0307_1066072.mRNA1, lcl|scaffold0370_918136.mRNA1, lcl|scaffold0105_276835.mRNA1.1, lcl|scaffold0935_348908.mRNA1
3	GO:0012505	endomembrane system	Cellular Component	GO:0044464	cell part	10.55	7	lcl|scaffold1494_91146.mRNA1.1, lcl|scaffold5118_868.mRNA1, lcl|scaffold0331_834438.mRNA1, lcl|scaffold0331_686228.mRNA1, lcl|scaffold0195_965653.mRNA1, lcl|scaffold1257_162662.mRNA1, lcl|scaffold2736_6544.mRNA1
3	GO:0044446	intracellular organelle part	Cellular Component	GO:0044422, GO:0044424, GO:0043229	organelle part, intracellular part, intracellular organelle	2.28	6	lcl|scaffold0457_538964.mRNA1, lcl|scaffold1494_91146.mRNA1.1, lcl|scaffold0331_686228.mRNA1, lcl|scaffold0625_43213.mRNA1, lcl|scaffold2736_6544.mRNA1, lcl|scaffold0427_434785.mRNA1
3	GO:0043227	membrane-bounded organelle	Cellular Component	GO:0043226	organelle	10.56	23	lcl|scaffold0716_566809.mRNA1.1, lcl|scaffold0625_1132.mRNA1, lcl|scaffold5118_868.mRNA1, lcl|scaffold0654_72554.mRNA1, lcl|scaffold0331_834438.mRNA1, lcl|scaffold0677_448742.mRNA1, lcl|scaffold0307_1066072.mRNA1, lcl|scaffold0625_43213.mRNA1, lcl|scaffold0370_918136.mRNA1, lcl|scaffold0143_850373.mRNA1, lcl|scaffold0128_1243168.mRNA1, lcl|scaffold0105_276835.mRNA1.1, lcl|scaffold0427_434785.mRNA…
3	GO:0044424	intracellular part	Cellular Component	GO:0005622, GO:0044464	intracellular, cell part	60.6	50	lcl|scaffold1222_136753.mRNA1, lcl|scaffold0625_1132.mRNA1, lcl|scaffold5118_868.mRNA1, lcl|scaffold0290_149234.mRNA1, lcl|scaffold0340_174387.mRNA1, lcl|scaffold0370_918136.mRNA1, lcl|scaffold0618_714426.mRNA1, lcl|scaffold0625_591792.mRNA1, lcl|scaffold0402_442046.mRNA1, lcl|scaffold0135_1578719.mRNA1, lcl|scaffold0457_538964.mRNA1, lcl|scaffold1494_91146.mRNA1.1, lcl|scaffold0625_11329.mRNA1, …
3	GO:0031224	intrinsic component of membrane	Cellular Component	GO:0044425	membrane part	3.73	6	lcl|scaffold0654_72554.mRNA1, lcl|scaffold2538_3915.mRNA1, lcl|scaffold0017_613025.mRNA1, lcl|scaffold0624_614895.mRNA1, lcl|scaffold0625_43213.mRNA1, lcl|scaffold0199_1670449.mRNA1
3	GO:0005622	intracellular	Cellular Component	GO:0044464	cell part	88.77	51	lcl|scaffold1222_136753.mRNA1, lcl|scaffold0625_1132.mRNA1, lcl|scaffold5118_868.mRNA1, lcl|scaffold0290_149234.mRNA1, lcl|scaffold0340_174387.mRNA1, lcl|scaffold0370_918136.mRNA1, lcl|scaffold0618_714426.mRNA1, lcl|scaffold0625_591792.mRNA1, lcl|scaffold0402_442046.mRNA1, lcl|scaffold0135_1578719.mRNA1, lcl|scaffold0457_538964.mRNA1, lcl|scaffold1494_91146.mRNA1.1, lcl|scaffold0625_11329.mRNA1, …
3	GO:0043234	protein complex	Cellular Component	GO:0032991	macromolecular complex	15.1	17	lcl|scaffold0716_566809.mRNA1.1, lcl|scaffold0654_72554.mRNA1, lcl|scaffold0290_149234.mRNA1, lcl|scaffold0677_448742.mRNA1, lcl|scaffold0625_43213.mRNA1, lcl|scaffold0307_1066072.mRNA1, lcl|scaffold0370_918136.mRNA1, lcl|scaffold0105_276835.mRNA1.1, lcl|scaffold1104_58290.mRNA1, lcl|scaffold0239_773114.mRNA1, lcl|scaffold1357_73336.mRNA1, lcl|scaffold0457_538964.mRNA1, lcl|scaffold0233_1484662.m…
3	GO:0071944	cell periphery	Cellular Component	GO:0044464	cell part	3.36	6	lcl|scaffold0052_812663.mRNA1, lcl|scaffold1375_37486.mRNA1, lcl|scaffold5118_868.mRNA1, lcl|scaffold0331_834438.mRNA1, lcl|scaffold1257_162662.mRNA1, lcl|scaffold0582_11826.mRNA1
3	GO:0043229	intracellular organelle	Cellular Component	GO:0005622, GO:0043226, GO:0044424	intracellular, organelle, intracellular part	11.95	25	lcl|scaffold0625_1132.mRNA1, lcl|scaffold5118_868.mRNA1, lcl|scaffold0331_834438.mRNA1, lcl|scaffold0370_918136.mRNA1, lcl|scaffold0128_1243168.mRNA1, lcl|scaffold0105_276835.mRNA1.1, lcl|scaffold0052_812663.mRNA1, lcl|scaffold0457_538964.mRNA1, lcl|scaffold1494_91146.mRNA1.1, lcl|scaffold0625_11329.mRNA1, lcl|scaffold0233_1484662.mRNA1, lcl|scaffold0716_566809.mRNA1.1, lcl|scaffold0654_72554.mRN…

## Sheet: KEGG pathway
Table S2-2 KEGG pathway results of the 114 unique proteins performed by KOBAS 3.0
Pathway	#Enzs in Pathway
Basic metabolism	37
Glycolysis / Gluconeogenesis	18
Biosynthesis of antibiotics	15
Amino acid metabolism	9
Amino sugar and nucleotide sugar metabolism	8
Starch and sucrose metabolism	8
Carbon fixation pathways	7
Fructose and mannose metabolism	6
Fatty acid metabolism	6
Galactose metabolism	5
Phosphatidylinositol signaling system	4
Pathway	Pathway	Pathway ID	#Enzs in Pathway	Enzyme	#Seqs of Enzyme	Seqs	Seqs no.
Glycolysis / Gluconeogenesis	Glycolysis / Gluconeogenesis	map00010	5	ec:2.7.1.90 - 1-phosphotransferase, ec:2.7.1.11 - phosphohexokinase, ec:5.3.1.1 - isomerase, ec:5.1.3.3 - 1-epimerase, ec:2.7.1.1 - hexokinase type IV glucokinase	1, 1, 2, 1, 1	lcl|scaffold0582_11826.mRNA1, lcl|scaffold0582_11826.mRNA1, lcl|scaffold0884_428899.mRNA1, lcl|scaffold0014_23288.mRNA1, lcl|scaffold1173_171897.mRNA1, lcl|scaffold0456_1002067.mRNA1	18
	Citrate cycle (TCA cycle)	map00020	2	ec:6.2.1.5 - ligase (ADP-forming), ec:1.1.1.37 - dehydrogenase	1, 1	lcl|scaffold0558_100711.mRNA1, lcl|scaffold0031_1390956.mRNA1
	Pyruvate metabolism	map00620	3	ec:2.3.1.9 - C-acetyltransferase, ec:1.1.1.37 - dehydrogenase, ec:4.4.1.5 - lyase	2, 1, 3	lcl|scaffold0992_72818.mRNA1, lcl|scaffold1479_76107.mRNA1, lcl|scaffold0031_1390956.mRNA1, lcl|scaffold0451_534194.mRNA1, lcl|scaffold0888_274749.mRNA1, lcl|scaffold0135_1578719.mRNA1
	Pentose and glucuronate interconversions	map00040	3	ec:1.1.1.22 - 6-dehydrogenase, ec:2.7.7.64 - uridylyltransferase, ec:2.7.7.9 - uridylyltransferase	2, 1, 1	lcl|scaffold0164_663082.mRNA1, lcl|scaffold0137_967149.mRNA1, lcl|scaffold0786_345204.mRNA1, lcl|scaffold0786_345204.mRNA1
	Pentose phosphate pathway	map00030	3	ec:2.7.1.15 - deoxyribokinase, ec:2.7.1.90 - 1-phosphotransferase, ec:2.7.1.11 - phosphohexokinase	1, 1, 1	lcl|scaffold0456_1002067.mRNA1, lcl|scaffold0582_11826.mRNA1, lcl|scaffold0582_11826.mRNA1
Biosynthesis of antibiotics	Biosynthesis of antibiotics	map01130	12	ec:2.7.1.90 - 1-phosphotransferase, ec:2.7.1.11 - phosphohexokinase, ec:2.5.1.47 - synthase, ec:5.3.1.1 - isomerase, ec:2.3.1.9 - C-acetyltransferase, ec:6.2.1.5 - ligase (ADP-forming), ec:2.7.7.64 - uridylyltransferase, ec:5.1.3.3 - 1-epimerase, ec:1.1.1.37 - dehydrogenase, ec:2.3.1.16 - C-acyltransferase, ec:2.7.1.1 - hexokinase type IV glucokinase, ec:2.7.7.9 - uridylyltransferase	1, 1, 1, 2, 2, 1, 1, 1, 1, 2, 1, 1	lcl|scaffold0582_11826.mRNA1, lcl|scaffold0582_11826.mRNA1, lcl|scaffold0114_231043.mRNA1, lcl|scaffold0884_428899.mRNA1, lcl|scaffold0014_23288.mRNA1, lcl|scaffold0992_72818.mRNA1, lcl|scaffold1479_76107.mRNA1, lcl|scaffold0558_100711.mRNA1, lcl|scaffold0786_345204.mRNA1, lcl|scaffold1173_171897.mRNA1, lcl|scaffold0031_1390956.mRNA1, lcl|scaffold0992_72818.mRNA1, lcl|scaffold1479_76107.mRNA1, lc…	15
	Neomycin, kanamycin and gentamicin biosynthesis	map00524	1	ec:2.7.1.1 - hexokinase type IV glucokinase	1	lcl|scaffold0456_1002067.mRNA1
	Streptomycin biosynthesis	map00521	1	ec:2.7.1.1 - hexokinase type IV glucokinase	1	lcl|scaffold0456_1002067.mRNA1
Galactose metabolism	Galactose metabolism	map00052	5	ec:2.7.1.11 - phosphohexokinase, ec:2.7.7.64 - uridylyltransferase, ec:5.1.3.3 - 1-epimerase, ec:2.7.1.1 - hexokinase type IV glucokinase, ec:2.7.7.9 - uridylyltransferase	1, 1, 1, 1, 1	lcl|scaffold0582_11826.mRNA1, lcl|scaffold0786_345204.mRNA1, lcl|scaffold1173_171897.mRNA1, lcl|scaffold0456_1002067.mRNA1, lcl|scaffold0786_345204.mRNA1	5
Amino sugar and nucleotide sugar metabolism	Amino sugar and nucleotide sugar metabolism	map00520	7	ec:1.1.1.22 - 6-dehydrogenase, ec:2.7.7.64 - uridylyltransferase, ec:5.4.99.30 - mutase, ec:2.7.1.1 - hexokinase type IV glucokinase, ec:2.7.1.4 - fructokinase (phosphorylating), ec:2.7.7.9 - uridylyltransferase, ec:3.2.1.14 - ChiC	2, 1, 1, 1, 1, 1, 1	lcl|scaffold0164_663082.mRNA1, lcl|scaffold0137_967149.mRNA1, lcl|scaffold0786_345204.mRNA1, lcl|scaffold0195_965653.mRNA1, lcl|scaffold0456_1002067.mRNA1, lcl|scaffold0456_1002067.mRNA1, lcl|scaffold0786_345204.mRNA1, lcl|scaffold0143_850373.mRNA1	8
Fructose and mannose metabolism	Fructose and mannose metabolism	map00051	5	ec:2.7.1.90 - 1-phosphotransferase, ec:2.7.1.11 - phosphohexokinase, ec:5.3.1.1 - isomerase, ec:2.7.1.1 - hexokinase type IV glucokinase, ec:2.7.1.4 - fructokinase (phosphorylating)	1, 1, 2, 1, 1	lcl|scaffold0582_11826.mRNA1, lcl|scaffold0582_11826.mRNA1, lcl|scaffold0884_428899.mRNA1, lcl|scaffold0014_23288.mRNA1, lcl|scaffold0456_1002067.mRNA1, lcl|scaffold0456_1002067.mRNA1	6
Basic metabolism	Phenylpropanoid biosynthesis	map00940	3	ec:3.2.1.21 - gentiobiase, ec:1.11.1.7 - lactoperoxidase, ec:2.1.1.68 - O-methyltransferase	3, 1, 1	lcl|scaffold0625_11329.mRNA1, lcl|scaffold0625_1132.mRNA1, lcl|scaffold0618_714426.mRNA1, lcl|scaffold0198_1471103.mRNA1, lcl|scaffold0664_98467.mRNA1	37
	Glyoxylate and dicarboxylate metabolism	map00630	2	ec:2.3.1.9 - C-acetyltransferase, ec:1.1.1.37 - dehydrogenase	2, 1	lcl|scaffold0992_72818.mRNA1, lcl|scaffold1479_76107.mRNA1, lcl|scaffold0031_1390956.mRNA1
	Biotin metabolism	map00780	1	ec:1.1.1.100 - reductase	1	lcl|scaffold0139_994147.mRNA1
	Sulfur metabolism	map00920	1	ec:2.5.1.47 - synthase	1	lcl|scaffold0114_231043.mRNA1
	Cyanoamino acid metabolism	map00460	1	ec:3.2.1.21 - gentiobiase	3	lcl|scaffold0625_11329.mRNA1, lcl|scaffold0625_1132.mRNA1, lcl|scaffold0618_714426.mRNA1
	Selenocompound metabolism	map00450	2	ec:2.1.1.13 - synthase, ec:2.1.1.14 - S-methyltransferase	2, 2	lcl|scaffold2412_20192.mRNA1, lcl|scaffold1465_23608.mRNA1, lcl|scaffold2412_20192.mRNA1, lcl|scaffold1465_23608.mRNA1
	alpha-Linolenic acid metabolism	map00592	1	ec:2.3.1.16 - C-acyltransferase	2	lcl|scaffold0992_72818.mRNA1, lcl|scaffold1479_76107.mRNA1
	Purine metabolism	map00230	2	ec:3.6.1.15 - phosphatase, ec:3.6.1.3 - adenylpyrophosphatase	7, 3	lcl|scaffold1104_58290.mRNA1, lcl|scaffold0972_315563.mRNA1, lcl|scaffold0479_272073.mRNA1.1, lcl|scaffold1032_279744.mRNA1, lcl|scaffold0280_1344905.mRNA1, lcl|scaffold0280_1322570.mRNA1, lcl|scaffold0050_2842364.mRNA1, lcl|scaffold1104_58290.mRNA1, lcl|scaffold0479_272073.mRNA1.1, lcl|scaffold0050_2842364.mRNA1
	Vitamin B6 metabolism	map00750	2	ec:1.1.1.65 - 4-dehydrogenase, ec:4.3.3.6 - 5'-phosphate synthase (glutamine hydrolysing)	1, 1	lcl|scaffold0178_966317.mRNA1, lcl|scaffold1257_162662.mRNA1
	Drug metabolism - cytochrome P450	map00982	1	ec:2.5.1.18 - transferase	4	lcl|scaffold0135_1578719.mRNA1, lcl|scaffold0434_14371.mRNA1, lcl|scaffold0944_314376.mRNA1, lcl|scaffold0197_1256978.mRNA1
	Benzoate degradation	map00362	2	ec:2.3.1.9 - C-acetyltransferase, ec:2.3.1.16 - C-acyltransferase	2, 2	lcl|scaffold0992_72818.mRNA1, lcl|scaffold1479_76107.mRNA1, lcl|scaffold0992_72818.mRNA1, lcl|scaffold1479_76107.mRNA1
	Methane metabolism	map00680	3	ec:2.7.1.11 - phosphohexokinase, ec:1.1.1.37 - dehydrogenase, ec:1.1.1.284 - dehydrogenase	1, 1, 1	lcl|scaffold0582_11826.mRNA1, lcl|scaffold0031_1390956.mRNA1, lcl|scaffold0444_830660.mRNA1
	Metabolism of xenobiotics by cytochrome P450	map00980	1	ec:2.5.1.18 - transferase	4	lcl|scaffold0135_1578719.mRNA1, lcl|scaffold0434_14371.mRNA1, lcl|scaffold0944_314376.mRNA1, lcl|scaffold0197_1256978.mRNA1
	C5-Branched dibasic acid metabolism	map00660	1	ec:6.2.1.5 - ligase (ADP-forming)	1	lcl|scaffold0558_100711.mRNA1
	One carbon pool by folate	map00670	1	ec:2.1.1.13 - synthase	2	lcl|scaffold2412_20192.mRNA1, lcl|scaffold1465_23608.mRNA1
	Terpenoid backbone biosynthesis	map00900	1	ec:2.3.1.9 - C-acetyltransferase	2	lcl|scaffold0992_72818.mRNA1, lcl|scaffold1479_76107.mRNA1
	Butanoate metabolism	map00650	1	ec:2.3.1.9 - C-acetyltransferase	2	lcl|scaffold0992_72818.mRNA1, lcl|scaffold1479_76107.mRNA1
	Thiamine metabolism	map00730	1	ec:3.6.1.15 - phosphatase	7	lcl|scaffold1104_58290.mRNA1, lcl|scaffold0972_315563.mRNA1, lcl|scaffold0479_272073.mRNA1.1, lcl|scaffold1032_279744.mRNA1, lcl|scaffold0280_1344905.mRNA1, lcl|scaffold0280_1322570.mRNA1, lcl|scaffold0050_2842364.mRNA1
	Drug metabolism - other enzymes	map00983	1	ec:3.1.1.1 - ali-esterase	1	lcl|scaffold0026_327123.mRNA1
	Geraniol degradation	map00281	1	ec:2.3.1.16 - C-acyltransferase	2	lcl|scaffold0992_72818.mRNA1, lcl|scaffold1479_76107.mRNA1
	Ethylbenzene degradation	map00642	1	ec:2.3.1.16 - C-acyltransferase	2	lcl|scaffold0992_72818.mRNA1, lcl|scaffold1479_76107.mRNA1
	Porphyrin and chlorophyll metabolism	map00860	1	ec:3.1.1.14 - CLH	1	lcl|scaffold0026_327123.mRNA1
	Propanoate metabolism	map00640	2	ec:2.3.1.9 - C-acetyltransferase, ec:6.2.1.5 - ligase (ADP-forming)	2, 1	lcl|scaffold0992_72818.mRNA1, lcl|scaffold1479_76107.mRNA1, lcl|scaffold0558_100711.mRNA1
	Ascorbate and aldarate metabolism	map00053	2	ec:1.1.1.22 - 6-dehydrogenase, ec:2.7.7.64 - uridylyltransferase	2, 1	lcl|scaffold0164_663082.mRNA1, lcl|scaffold0137_967149.mRNA1, lcl|scaffold0786_345204.mRNA1
	Aminobenzoate degradation	map00627	1	ec:3.1.3.41 - nitrophenyl phosphatase	1	lcl|scaffold1151_1703.mRNA1.1
	Glutathione metabolism	map00480	2	ec:2.5.1.18 - transferase, ec:1.11.1.15 - thioredoxin peroxidase	4, 1	lcl|scaffold0135_1578719.mRNA1, lcl|scaffold0434_14371.mRNA1, lcl|scaffold0944_314376.mRNA1, lcl|scaffold0197_1256978.mRNA1, lcl|scaffold0198_1471103.mRNA1
Amino acid metabolism	Tryptophan metabolism	map00380	1	ec:2.3.1.9 - C-acetyltransferase	2	lcl|scaffold0992_72818.mRNA1, lcl|scaffold1479_76107.mRNA1	9
	Lysine degradation	map00310	1	ec:2.3.1.9 - C-acetyltransferase	2	lcl|scaffold0992_72818.mRNA1, lcl|scaffold1479_76107.mRNA1
	Valine, leucine and isoleucine degradation	map00280	2	ec:2.3.1.9 - C-acetyltransferase, ec:2.3.1.16 - C-acyltransferase	2, 2	lcl|scaffold0992_72818.mRNA1, lcl|scaffold1479_76107.mRNA1, lcl|scaffold0992_72818.mRNA1, lcl|scaffold1479_76107.mRNA1
	Cysteine and methionine metabolism	map00270	5	ec:2.5.1.6 - adenosyltransferase, ec:2.1.1.13 - synthase, ec:2.1.1.14 - S-methyltransferase, ec:2.5.1.47 - synthase, ec:1.1.1.37 - dehydrogenase	1, 2, 2, 1, 1	lcl|scaffold0005_28735.mRNA1, lcl|scaffold2412_20192.mRNA1, lcl|scaffold1465_23608.mRNA1, lcl|scaffold2412_20192.mRNA1, lcl|scaffold1465_23608.mRNA1, lcl|scaffold0114_231043.mRNA1, lcl|scaffold0031_1390956.mRNA1
	Alanine, aspartate and glutamate metabolism	map00250	1	ec:6.3.5.4 - synthase (glutamine-hydrolysing)	1	lcl|scaffold0548_575390.mRNA1
Fatty acid metabolism	Synthesis and degradation of ketone bodies	map00072	1	ec:2.3.1.9 - C-acetyltransferase	2	lcl|scaffold0992_72818.mRNA1, lcl|scaffold1479_76107.mRNA1	6
	Fatty acid elongation	map00062	1	ec:2.3.1.16 - C-acyltransferase	2	lcl|scaffold0992_72818.mRNA1, lcl|scaffold1479_76107.mRNA1
	Ether lipid metabolism	map00565	1	ec:3.1.4.4 - D	1	lcl|scaffold0331_834438.mRNA1
	Biosynthesis of unsaturated fatty acids	map01040	2	ec:1.1.1.100 - reductase, ec:2.3.1.16 - C-acyltransferase	1, 2	lcl|scaffold0139_994147.mRNA1, lcl|scaffold0992_72818.mRNA1, lcl|scaffold1479_76107.mRNA1
	Fatty acid degradation	map00071	2	ec:2.3.1.9 - C-acetyltransferase, ec:2.3.1.16 - C-acyltransferase	2, 2	lcl|scaffold0992_72818.mRNA1, lcl|scaffold1479_76107.mRNA1, lcl|scaffold0992_72818.mRNA1, lcl|scaffold1479_76107.mRNA1
	Fatty acid biosynthesis	map00061	2	ec:1.1.1.100 - reductase, ec:2.3.1.85 - synthase	1, 1	lcl|scaffold0139_994147.mRNA1, lcl|scaffold0139_994147.mRNA1
Phosphatidylinositol signaling system	Phosphatidylinositol signaling system	map04070	1	ec:3.1.4.11 - phospholipase C	1	lcl|scaffold0470_417147.mRNA1	4
	Glycerophospholipid metabolism	map00564	1	ec:3.1.4.4 - D	1	lcl|scaffold0331_834438.mRNA1
	Inositol phosphate metabolism	map00562	2	ec:5.3.1.1 - isomerase, ec:3.1.4.11 - phospholipase C	2, 1	lcl|scaffold0884_428899.mRNA1, lcl|scaffold0014_23288.mRNA1, lcl|scaffold0470_417147.mRNA1
Carbon fixation pathways	Carbon fixation pathways in prokaryotes	map00720	3	ec:2.3.1.9 - C-acetyltransferase, ec:6.2.1.5 - ligase (ADP-forming), ec:1.1.1.37 - dehydrogenase	2, 1, 1	lcl|scaffold0992_72818.mRNA1, lcl|scaffold1479_76107.mRNA1, lcl|scaffold0558_100711.mRNA1, lcl|scaffold0031_1390956.mRNA1	7
	Carbon fixation in photosynthetic organisms	map00710	3	ec:3.1.3.37 - SBPase, ec:5.3.1.1 - isomerase, ec:1.1.1.37 - dehydrogenase	1, 2, 1	lcl|scaffold1151_1703.mRNA1.1, lcl|scaffold0884_428899.mRNA1, lcl|scaffold0014_23288.mRNA1, lcl|scaffold0031_1390956.mRNA1
Starch and sucrose metabolism	Starch and sucrose metabolism	map00500	5	ec:3.2.1.21 - gentiobiase, ec:3.2.1.39 - endo-1,3-beta-D-glucosidase, ec:2.7.1.1 - hexokinase type IV glucokinase, ec:2.7.1.4 - fructokinase (phosphorylating), ec:2.7.7.9 - uridylyltransferase	3, 2, 1, 1, 1	lcl|scaffold0625_11329.mRNA1, lcl|scaffold0625_1132.mRNA1, lcl|scaffold0618_714426.mRNA1, lcl|scaffold0625_11329.mRNA1, lcl|scaffold0625_1132.mRNA1, lcl|scaffold0456_1002067.mRNA1, lcl|scaffold0456_1002067.mRNA1, lcl|scaffold0786_345204.mRNA1	8

## Sheet: COG results
Table S2-3 The COG results of the 114 unique proteins performed by WebMGA
#COG class	count	description
C	7	Energy production and conversion
D	2	Cell cycle control, cell division, chromosome partitioning
E	6	Amino acid transport and metabolism
G	13	Carbohydrate transport and metabolism
H	2	Coenzyme transport and metabolism
I	7	Lipid transport and metabolism
J	5	Translation, ribosomal structure and biogenesis
K	1	Transcription
M	4	Cell wall/membrane/envelope biogenesis
N	1	Cell motility
O	26	Posttranslational modification, protein turnover, chaperones
P	2	Inorganic ion transport and metabolism
Q	2	Secondary metabolites biosynthesis, transport and catabolism
R	18	General function prediction only
S	1	Function unknown
T	4	Signal transduction mechanisms
U	1	Intracellular trafficking, secretion, and vesicular transport
Z	3	Cytoskeleton
#Query	Hit	E-value	Identity	Score	Query-start	Query-end	Hit-start	Hit-end	Hit-length	description	class	class description
lcl|scaffold0198_1471103.mRNA1	COG0678	6e-48	42	183	4	162	3	165	165	Peroxiredoxin	O	Posttranslational modification, protein turnover, chaperones
lcl|scaffold0290_149234.mRNA1	COG1310	3e-20	28	92.5	49	166	1	123	134	Predicted metal-dependent protease of the PAD1/JAB1 superfamily	R	General function prediction only
lcl|scaffold0427_434785.mRNA1	COG0605	4e-71	49	261	33	230	4	200	204	Superoxide dismutase	P	Inorganic ion transport and metabolism
lcl|scaffold0331_834438.mRNA1	COG1502	3e-13	18	71	182	491	75	294	438	Phosphatidylserine/phosphatidylglycerophosphate/cardiolipin synthases and related enzymes	I	Lipid transport and metabolism
lcl|scaffold0139_994147.mRNA1	COG1028	1e-61	39	229	40	290	2	250	251	Dehydrogenases with different specificities (related to short-chain alcohol dehydrogenases)	IQR	Multiple classes
lcl|scaffold0912_275877.mRNA1	COG1091	4e-13	23	69.2	16	279	1	262	281	dTDP-4-dehydrorhamnose reductase	M	Cell wall/membrane/envelope biogenesis
lcl|scaffold0370_918136.mRNA1	COG0638	1e-31	26	129	16	232	16	229	236	20S proteasome, alpha and beta subunits	O	Posttranslational modification, protein turnover, chaperones
lcl|scaffold0935_348908.mRNA1	COG0638	2e-48	37	185	23	250	1	228	236	20S proteasome, alpha and beta subunits	O	Posttranslational modification, protein turnover, chaperones
lcl|scaffold0100_712967.mRNA1	COG3621	7e-29	28	121	66	315	8	234	394	Patatin	R	General function prediction only
lcl|scaffold0884_428899.mRNA1	COG0149	1e-78	47	286	3	248	2	247	251	Triosephosphate isomerase	G	Carbohydrate transport and metabolism
lcl|scaffold0164_663082.mRNA1	COG1004	1e-101	39	362	3	453	2	414	414	Predicted UDP-glucose 6-dehydrogenase	M	Cell wall/membrane/envelope biogenesis
lcl|scaffold0135_1578719.mRNA1	COG0625	4e-27	28	114	6	191	2	194	211	Glutathione S-transferase	O	Posttranslational modification, protein turnover, chaperones
lcl|scaffold0156_1465807.mRNA1	COG5126	1e-45	56	175	4	149	13	157	160	Ca2+-binding protein (EF-Hand superfamily)	TZDR	Multiple classes
lcl|scaffold0052_812663.mRNA1	COG3118	1e-14	44	72	51	123	47	120	304	Thioredoxin domain-containing protein	O	Posttranslational modification, protein turnover, chaperones
lcl|scaffold0654_72554.mRNA1	COG5078	7e-55	47	205	1	151	1	152	153	Ubiquitin-protein ligase	O	Posttranslational modification, protein turnover, chaperones
lcl|scaffold0178_966317.mRNA1	COG0667	2e-81	39	296	238	524	2	305	316	Predicted oxidoreductases (related to aryl-alcohol dehydrogenases)	C	Energy production and conversion
lcl|scaffold0479_272073.mRNA1.1	COG0012	1e-127	47	448	24	388	2	372	372	Predicted GTPase, probable translation factor	J	Translation, ribosomal structure and biogenesis
lcl|scaffold0451_534194.mRNA1	COG0346	3e-12	21	66.3	56	180	1	138	138	Lactoylglutathione lyase and related lyases	E	Amino acid transport and metabolism
lcl|scaffold0451_534194.mRNA1	COG3324	2e-06	25	46.6	193	307	15	117	127	Predicted enzyme related to lactoylglutathione lyase	R	General function prediction only
lcl|scaffold1479_76107.mRNA1	COG0183	2e-88	44	320	11	402	1	390	392	Acetyl-CoA acetyltransferase	I	Lipid transport and metabolism
lcl|scaffold0456_1002067.mRNA1	COG0524	3e-64	36	238	15	331	2	311	311	Sugar kinases, ribokinase family	G	Carbohydrate transport and metabolism
lcl|scaffold2412_20192.mRNA1	COG0620	1e-131	58	461	428	758	1	328	330	Methionine synthase II (cobalamin-independent)	E	Amino acid transport and metabolism
lcl|scaffold0105_276835.mRNA1.1	COG0638	2e-34	29	139	10	217	25	220	236	20S proteasome, alpha and beta subunits	O	Posttranslational modification, protein turnover, chaperones
lcl|scaffold0444_830660.mRNA1	COG1062	1e-137	62	482	58	377	50	365	366	Zn-dependent alcohol dehydrogenases, class III	C	Energy production and conversion
lcl|scaffold0005_28735.mRNA1	COG0192	0	60	629	1	381	2	374	388	S-adenosylmethionine synthetase	H	Coenzyme transport and metabolism
lcl|scaffold0624_614895.mRNA1	COG0589	5e-06	23	43.8	10	133	9	129	154	Universal stress protein UspA and related nucleotide-binding proteins	T	Signal transduction mechanisms
lcl|scaffold1151_1703.mRNA1.1	COG0406	2e-12	23	66.4	15	201	2	166	208	Fructose-2,6-bisphosphatase	G	Carbohydrate transport and metabolism
lcl|scaffold0143_850373.mRNA1	COG3469	3e-11	22	62.6	90	297	91	323	332	Chitinase	G	Carbohydrate transport and metabolism
lcl|scaffold0050_2842364.mRNA1	COG0464	1e-154	51	539	225	752	1	488	494	ATPases of the AAA+ class	O	Posttranslational modification, protein turnover, chaperones
lcl|scaffold1220_115657.mRNA1	COG0074	2e-51	31	197	37	318	33	293	293	Succinyl-CoA synthetase, alpha subunit	C	Energy production and conversion
lcl|scaffold1220_115657.mRNA1	COG0372	3e-33	23	137	396	608	179	381	390	Citrate synthase	C	Energy production and conversion
lcl|scaffold5118_868.mRNA1	COG5608	2e-08	23	53.2	44	156	25	138	161	Conserved secreted protein	S	Function unknown
lcl|scaffold0114_231043.mRNA1	COG0031	1e-123	58	435	85	384	1	299	300	Cysteine synthase	E	Amino acid transport and metabolism
lcl|scaffold0114_231043.mRNA1	COG0498	1e-09	25	58.9	412	678	93	368	411	Threonine synthase	E	Amino acid transport and metabolism
lcl|scaffold0645_687748.mRNA1	COG0071	4e-22	40	97.4	57	161	43	146	146	Molecular chaperone (small heat shock protein)	O	Posttranslational modification, protein turnover, chaperones
lcl|scaffold1494_91146.mRNA1.1	COG0545	2e-20	47	92.5	37	121	124	205	205	FKBP-type peptidyl-prolyl cis-trans isomerases 1	O	Posttranslational modification, protein turnover, chaperones
lcl|scaffold0944_314376.mRNA1	COG0625	1e-29	29	122	4	207	1	201	211	Glutathione S-transferase	O	Posttranslational modification, protein turnover, chaperones
lcl|scaffold1357_73336.mRNA1	COG0638	1e-64	42	239	4	235	1	233	236	20S proteasome, alpha and beta subunits	O	Posttranslational modification, protein turnover, chaperones
lcl|scaffold1772_2818.mRNA1	COG0589	2e-12	22	65.7	38	170	4	154	154	Universal stress protein UspA and related nucleotide-binding proteins	T	Signal transduction mechanisms
lcl|scaffold0677_448742.mRNA1	COG0638	7e-66	44	243	6	237	1	232	236	20S proteasome, alpha and beta subunits	O	Posttranslational modification, protein turnover, chaperones
lcl|scaffold0402_442046.mRNA1	COG0696	1e-102	38	366	21	547	4	498	509	Phosphoglyceromutase	G	Carbohydrate transport and metabolism
lcl|scaffold1413_46445.mRNA1	COG0464	1e-155	53	541	254	750	1	485	494	ATPases of the AAA+ class	O	Posttranslational modification, protein turnover, chaperones
lcl|scaffold0947_141222.mRNA1	COG4826	5e-56	29	212	11	388	43	407	410	Serine protease inhibitor	O	Posttranslational modification, protein turnover, chaperones
lcl|scaffold0753_102318.mRNA1	COG0457	5e-07	21	49.8	239	487	12	267	291	FOG: TPR repeat	R	General function prediction only
lcl|scaffold0753_102318.mRNA1	COG4783	6e-05	24	43.2	11	117	315	421	484	Putative Zn-dependent protease, contains TPR repeats	R	General function prediction only
lcl|scaffold0558_100711.mRNA1	COG0045	2e-45	25	177	94	506	2	382	387	Succinyl-CoA synthetase, beta subunit	C	Energy production and conversion
lcl|scaffold0625_11329.mRNA1	COG5309	6e-06	19	45.6	5	343	24	305	305	Exo-beta-1,3-glucanase	G	Carbohydrate transport and metabolism
lcl|scaffold0677_45450.mRNA1	COG0657	1e-29	28	124	41	325	40	303	312	Esterase/lipase	I	Lipid transport and metabolism
lcl|scaffold1465_23608.mRNA1	COG0620	1e-130	58	460	429	758	2	328	330	Methionine synthase II (cobalamin-independent)	E	Amino acid transport and metabolism
lcl|scaffold0280_1344905.mRNA1	COG0699	4e-06	20	47.2	102	375	1	258	546	Predicted GTPases (dynamin-related)	R	General function prediction only
lcl|scaffold3444_7763.mRNA1	COG5038	3e-09	26	54.8	2	125	1038	1157	1227	Ca2+-dependent lipid-binding protein, contains C2 domain	R	General function prediction only
lcl|scaffold0331_686228.mRNA1	COG5491	1e-14	30	73.7	36	223	5	202	204	Conserved protein implicated in secretion	N	Cell motility
lcl|scaffold1093_241290.mRNA1	COG0797	0.0009	28	37.1	140	196	123	178	233	Lipoproteins	M	Cell wall/membrane/envelope biogenesis
lcl|scaffold0434_14371.mRNA1	COG0625	2e-28	29	119	4	208	2	202	211	Glutathione S-transferase	O	Posttranslational modification, protein turnover, chaperones
lcl|scaffold0554_569198.mRNA1	COG5277	1e-128	47	453	395	763	8	444	444	Actin and related proteins	Z	Cytoskeleton
lcl|scaffold0901_132647.mRNA1	COG5038	1e-10	27	59.8	3	89	433	523	1227	Ca2+-dependent lipid-binding protein, contains C2 domain	R	General function prediction only
lcl|scaffold0344_256841.mRNA1	COG0071	3e-23	34	101	20	157	10	146	146	Molecular chaperone (small heat shock protein)	O	Posttranslational modification, protein turnover, chaperones
lcl|scaffold0912_144680.mRNA1	COG0666	6e-14	40	72.2	230	346	78	202	235	FOG: Ankyrin repeat	R	General function prediction only
lcl|scaffold0233_1484662.mRNA1	COG5148	4e-65	46	242	1	252	1	235	243	26S proteasome regulatory complex, subunit RPN10/PSMD4	O	Posttranslational modification, protein turnover, chaperones
lcl|scaffold1257_162662.mRNA1	COG0214	1e-146	70	511	16	307	2	294	296	Pyridoxine biosynthesis enzyme	H	Coenzyme transport and metabolism
lcl|scaffold0197_1256978.mRNA1	COG0625	6e-31	31	127	5	208	1	201	211	Glutathione S-transferase	O	Posttranslational modification, protein turnover, chaperones
lcl|scaffold0972_315563.mRNA1	COG5256	0	60	646	1	431	1	428	428	Translation elongation factor EF-1alpha (GTPase)	J	Translation, ribosomal structure and biogenesis
lcl|scaffold0972_315563.mRNA1	COG4108	3e-08	30	54.6	514	623	17	117	528	Peptide chain release factor RF-3	J	Translation, ribosomal structure and biogenesis
lcl|scaffold0491_874744.mRNA1	COG2092	1e-13	26	70	143	233	2	88	88	Translation elongation factor EF-1beta	J	Translation, ribosomal structure and biogenesis
lcl|scaffold0014_23288.mRNA1	COG0149	2e-80	49	292	3	248	2	247	251	Triosephosphate isomerase	G	Carbohydrate transport and metabolism
lcl|scaffold0888_274749.mRNA1	COG0346	9e-11	21	60.9	19	143	1	138	138	Lactoylglutathione lyase and related lyases	E	Amino acid transport and metabolism
lcl|scaffold0888_274749.mRNA1	COG3324	5e-05	26	41.9	156	270	15	117	127	Predicted enzyme related to lactoylglutathione lyase	R	General function prediction only
lcl|scaffold0026_327123.mRNA1	COG0657	1e-05	23	44.2	49	193	53	190	312	Esterase/lipase	I	Lipid transport and metabolism
lcl|scaffold0592_368115.mRNA1.1	COG0666	2e-13	39	70.6	230	346	78	202	235	FOG: Ankyrin repeat	R	General function prediction only
lcl|scaffold2736_6544.mRNA1	COG5064	1e-175	55	607	10	528	8	526	526	Karyopherin (importin) alpha	U	Intracellular trafficking, secretion, and vesicular transport
lcl|scaffold0992_72818.mRNA1	COG0183	9e-88	45	317	15	406	1	390	392	Acetyl-CoA acetyltransferase	I	Lipid transport and metabolism
lcl|scaffold0239_773114.mRNA1	COG1382	7e-05	21	39.6	14	124	7	118	119	Prefoldin, chaperonin cofactor	O	Posttranslational modification, protein turnover, chaperones
lcl|scaffold2041_42337.mRNA1	COG5126	7e-12	29	64.6	122	248	25	155	160	Ca2+-binding protein (EF-Hand superfamily)	TZDR	Multiple classes
lcl|scaffold0280_1322570.mRNA1	COG0699	3e-05	19	44.1	102	375	1	258	546	Predicted GTPases (dynamin-related)	R	General function prediction only
lcl|scaffold1173_171897.mRNA1	COG2017	2e-64	35	239	1	339	6	308	308	Galactose mutarotase and related enzymes	G	Carbohydrate transport and metabolism
lcl|scaffold0340_174387.mRNA1	COG2016	7e-32	34	130	16	178	5	159	161	Predicted RNA-binding protein (contains PUA domain)	J	Translation, ribosomal structure and biogenesis
lcl|scaffold0066_550349.mRNA1	COG1730	3e-14	27	71.2	25	155	7	140	145	Predicted prefoldin, molecular chaperone implicated in de novo protein folding	O	Posttranslational modification, protein turnover, chaperones
lcl|scaffold1104_58290.mRNA1	COG1390	4e-19	25	88.6	10	226	4	193	194	Archaeal/vacuolar-type H+-ATPase subunit E	C	Energy production and conversion
lcl|scaffold0137_967149.mRNA1	COG1004	1e-102	38	365	3	453	2	414	414	Predicted UDP-glucose 6-dehydrogenase	M	Cell wall/membrane/envelope biogenesis
lcl|scaffold0716_566809.mRNA1.1	COG0638	1e-30	26	127	86	302	16	229	236	20S proteasome, alpha and beta subunits	O	Posttranslational modification, protein turnover, chaperones
lcl|scaffold1194_13551.mRNA1	COG1028	4e-31	26	130	199	465	8	214	251	Dehydrogenases with different specificities (related to short-chain alcohol dehydrogenases)	IQR	Multiple classes
lcl|scaffold1194_13551.mRNA1	COG0300	4e-22	21	100	501	749	7	193	265	Short-chain dehydrogenases of various substrate specificities	R	General function prediction only
lcl|scaffold0530_34184.mRNA1	COG0443	0	53	709	8	618	6	578	579	Molecular chaperone	O	Posttranslational modification, protein turnover, chaperones
lcl|scaffold0031_1390956.mRNA1	COG0039	3e-61	31	228	6	327	1	307	313	Malate/lactate dehydrogenases	C	Energy production and conversion
lcl|scaffold0786_345204.mRNA1	COG4284	3e-93	38	335	29	465	55	471	472	UDP-glucose pyrophosphorylase	G	Carbohydrate transport and metabolism
lcl|scaffold0307_1066072.mRNA1	COG0638	9e-28	26	117	4	198	33	227	236	20S proteasome, alpha and beta subunits	O	Posttranslational modification, protein turnover, chaperones
lcl|scaffold0625_1132.mRNA1	COG5309	1e-06	18	48.3	4	343	23	305	305	Exo-beta-1,3-glucanase	G	Carbohydrate transport and metabolism
lcl|scaffold0618_714426.mRNA1	COG2723	1e-127	40	449	24	492	4	456	460	Beta-glucosidase/6-phospho-beta-glucosidase/beta-galactosidase	G	Carbohydrate transport and metabolism
lcl|scaffold0470_417147.mRNA1	COG5038	2e-05	27	44.7	457	526	1062	1127	1227	Ca2+-dependent lipid-binding protein, contains C2 domain	R	General function prediction only
lcl|scaffold0582_11826.mRNA1	COG0205	6e-76	25	278	94	528	2	347	347	6-phosphofructokinase	G	Carbohydrate transport and metabolism
lcl|scaffold0378_586227.mRNA1	COG0696	1e-101	38	361	21	548	4	498	509	Phosphoglyceromutase	G	Carbohydrate transport and metabolism
lcl|scaffold1032_279744.mRNA1	COG0378	4e-63	48	235	308	502	10	198	202	Ni2+-binding GTPase involved in regulation of expression and maturation of urease and hydrogenase	OK	Multiple classes
lcl|scaffold1032_279744.mRNA1	COG4531	0.0006	25	39.7	221	271	100	158	318	ABC-type Zn2+ transport system, periplasmic component/surface adhesin	P	Inorganic ion transport and metabolism
lcl|scaffold0356_425272.mRNA1	COG0484	3e-90	39	326	10	364	3	352	371	DnaJ-class molecular chaperone with C-terminal Zn finger domain	O	Posttranslational modification, protein turnover, chaperones

## Sheet: mean of column heading
Table S2-4 meaning of the column headings of Table S2-3
column of S2-1	mean of column heading
Level	The level of used Gene Ontology
GO ID	The GO ID of the protein present in database
GO Name	The GO name of the protein present in database
GO Type	The GO type of the protein present in database
Parents (ACC)	the GO ID which connected with current GO
Parents (Name)	the GO name which connected with current GO
Nodescore	the score between the connected two GO
#Seqs	the sequences number under this GO of our input
Sequence Names	the sequences under this GO of our input
column of S2-2	mean of column heading
Pathway	Pathway name in the database
Pathway ID	Pathway ID in the database
#Enzs in Pathway	the whole count of enzymes in this pathway of our input
Enzyme	the numbering of enzymes in this pathway of our input
#Seqs of Enzyme	the count of each enzymes in this pathway of our input
Seqs	the sequences of enzymes in this pathway of our input
Seqs no.	the sequences number of enzymes in this pathway of our input
column of S2-3	mean of column heading
#Query	the acession number of our input
Hit	the COG ID in the database
E-value	the expect-value of this analysis
Score	the score of this analysis
Query-start	start position of query sequence
Query-end	end position of query sequence
Hit-start	start position of hit
Hit-end	end position of hit
Hit-length	the hit-length of the protein mathced in database
description	the description of the protein mathced in database
class	the class of the protein mathced in database
class description	the class description of the protein mathced in database
