# Supplementary material for: Physiological and Proteomic Analyses of Molybdenum- and Ethylene-Responsive Mechanisms in Rubber Latex
Source: Front Plant Sci. 2018 May 15;9:621. doi: 10.3389/fpls.2018.00621 (PMC5962772; doi:10.3389/fpls.2018.00621)
Supplement: TABLE S3 — Primers and qRT-PCR analysis of the gene expression of the corresponding DEPs in rubber latex. [file Table_3.XLSX]

## Sheet: MS data of the selected protein
Table S3-1 The MS data of 25 selected unique protein
NO.	Accession number	Name	Thero.pI/Mr	Exper. pI/Mr	Mathed peptide number	Sequence coverage %	Mascot score	CK	Eth	Mo	EMo	CK/CK	Eth/CK	Mo/CK	EMo/CK
62	scaffold0066_550349.mRNA1	prefoldin subunit 5 like;	8.59/17.31	9.20/15.56	5	40	456	0.022	0.016	0.006	0.052	1	0.742	0.29	2.34
13	scaffold0100_712967.mRNA1	Patatin-like protein 2 like;	5.13/49.14	4.56/46.76	4	12	306	0.069	0.031	0.063	0.062	1	0.453	0.0919	0.903
111	scaffold0100_712967.mRNA1	Patatin-like protein 2 like;	5.13/49.14	4.67/47.43	8	28	539	0.159	0.15	0.204	0.099	1	0.947	1.283	0.624
96	scaffold0139_994147.mRNA1	Glucose and ribitol dehydrogenase like;	5.29/32.31	5.28/36.87	7	28	478	0.021	0.025	0.014	0.011	1	1.194	0.661	0.512
110	scaffold0139_994147.mRNA1	Glucose and ribitol dehydrogenase like;	5.29/32.31	5.56/36.53	4	13	154	0.024	0.018	0.017	0.014	1	0.754	0.724	0.61
4	scaffold0155_515853.mRNA1	Pro-hevein like;	8.15/23.04	5.20/17.54	2	18	211	0.036	0.01	0.041	0.03	1	0.273	1.124	0.817
17	scaffold0155_515853.mRNA1	Pro-hevein like;	8.15/23.04	5.53/19.27	3	23	286	0.178	0.089	0.147	0.179	1	0.503	0.826	1.009
24	scaffold0155_515853.mRNA1	Pro-hevein like;	8.15/23.04	5.60/18.97	2	18	235	0.469	0.254	0.402	0.364	1	0.542	0.857	0.776
29	scaffold0155_515853.mRNA1	Pro-hevein like	8.15/23.04	6.70/14.86	2	18	168	0.175	0.104	0.164	0.247	1	0.593	0.939	1.414
15	scaffold0013_2366000.mRNA1	Annexin-like protein RJ4 like;	7.72/36.06	7.50/35.56	3	11	198	0.043	0.021	0.019	0.022	1	0.485	0.431	0.511
118	scaffold0014_190374.mRNA1	Cysteine proteinase inhibitor like;	5.45/11.24	5.36/14.32	4	42	245	0.112	0.184	0.048	0.106	1	1.65017	0.427393	0.945545
136	scaffold0014_190374.mRNA1	Cysteine proteinase inhibitor like;	5.45/11.24	5.00/13.80	5	63	437	0.231	0.179	0.102	0.125	1	0.773395	0.443155	0.541377
102	scaffold0017_613025.mRNA1	Cysteine proteinase inhibitor 12 like;	6.87/27.23	7.32/24.61	8	43	671	0.005	0.005	0.036	0.035	1	0.845	6.648	6.548
76	scaffold0026_327123.mRNA1	Chlorophyllase type 0 like;	6.30/37.79	6.50/19.45	2	16	182	0.231	0.203	0.123	0.273	1	0.879	0.534	1.182
78	scaffold0026_327123.mRNA1	Chlorophyllase type 0 like;	6.30/37.79	6.30/19.45	3	19	158	0.082	0.08	0.044	0.099	1	0.976	0.539	1.2
148	scaffold0026_327123.mRNA1	Chlorophyllase type 0 like;	6.30/37.79	7.04/16.00	3	14	173	0.038	0.065	0.107	0.029	1	1.68634	2.79764	0.748735
6	scaffold0026_1110574.mRNA1	Actin-7 like;	5.31/41.89	5.31/93.24	10	40	644	0.013	0.004	0.004	0.007	1	0.286	0.278	0.566
7	scaffold0026_1110574.mRNA1	Actin-7 like;	5.31/41.89	5.31/94.32	10	40	653	0.015	0.004	0.005	0.007	1	0.297	0.351	0.49
43	scaffold0026_1110574.mRNA1	Actin-7 like;	5.31/41.90	5.35/52.98	9	36	521	0.016	0.03	0.022	0.018	1	1.952	1.393	1.17
12	scaffold0029_867537.mRNA1	Universal stress protein A-like protein	5.87/20.17	6.18/21.05	3	19	202	0.036	0.016	0.015	0.024	1	0.449	0.407	0.671
168	scaffold0470_417147.mRNA1	Phosphoinositide phospholipase C 2 like;	5.38/63.74	5.44/66.54	9	24	614	0.064	0.007	0.037	0.077	1	1.09398	0.573066	1.18968
169	scaffold0470_417147.mRNA1	Phosphoinositide phospholipase C 2 like;	5.38/63.74	5.40/66.54	8	22	549	0.04	0.04	0.025	0.062	1	1.0168	0.622278	1.56565
33	scaffold0491_874744.mRNA1	Elongation factor 1-delta like;	4.51/25.91	4.02/35.68	5	31	192	0.035	0.022	0.007	0.016	1	0.615	0.201	0.455
77	scaffold0618_714426.mRNA1	Beta-glucosidase 42 like;	5.49/56.73	5.60/65.03	5	15	263	0.038	0.039	0.02	0.035	1	1.038	0.535	0.923
20	scaffold0625_11329.mRNA1	Glucan endo-1,3-beta-glucosidase, basic vacuolar isoform like;	9.27/41.51	9.60/39.45	9	41	1073	0.234	0.122	0.368	0.175	1	0.524	1.576	0.751
22	scaffold0625_11329.mRNA1	Glucan endo-1,3-beta-glucosidase, basic vacuolar isoform like;	9.27/41.51	9.16/37.62	5	24	375	0.04	0.022	0.018	0.016	1	0.534	0.452	0.39
30	scaffold0625_11329.mRNA1	Glucan endo-1,3-beta-glucosidase, basic vacuolar isoform like;	9.27/41.51	9.64/38.67	10	42	846	2.45	1.455	3.844	2.337	1	0.594	1.569	0.954
21	scaffold0331_686228.mRNA1	Vacuolar protein sorting-associated protein 2 homolog 1 like;	5.55/25.16	5.84/34.23	4	20	231	0.007	0.004	0.011	0.008	1	0.532	1.585	1.125
55	scaffold0331_834438.mRNA1	Phospholipase D alpha 1 like;	5.60/88.90	6.00/88.90	9	17	487	0.018	0.028	0.023	0.034	1	1.512	1.231	1.878
158	scaffold0427_434785.mRNA1	Superoxide dismutase [Mn], mitochondrial like;	7.82/26.15	6.26/23.05	5	37	393	0.072	0.07	0.074	0.157	1	0.981354	1.02944	2.20118
60	scaffold0444_175845.mRNA1	Ubiquitin-conjugating enzyme E2 35 like;	6.74/17.27	6.73/15.45	6	58	389	0.033	0.026	0.007	0.009	1	0.792	0.225	0.265
39	scaffold0686_576053.mRNA1	pyridoxal biosynthesis protein PDX1 like;	6.26/33.40	6.70/35.43	5	27	162	0.017	0.037	0.071	0.017	1	2.164	4.163	1.027
8	scaffold0944_314376.mRNA1	Glutathione S-transferase PARB like;	6.31/23.87	6.85/23.54	5	36	317	0.023	0.007	0.013	0.009	1	0.3	0.584	0.386
2	scaffold1173_171897.mRNA1	Aldose 1-epimerase like;	5.70/36.96	5.80/37.01	4	23	127	0.013	0.002	0.008	0.002	1	0.149	0.613	0.183
52	scaffold1479_76107.mRNA1	Acetyl-CoA acetyltransferase, cytosolic 1 like;	6.01/41.65	6.10/47.43	4	20	299	0.012	0.018	0.009	0.01	1	1.559	0.741	0.816
84	scaffold1479_76107.mRNA1	Acetyl-CoA acetyltransferase, cytosolic 1 like;	6.01/41.65	6.78/45.65	10	48	1070	0.23	0.262	0.133	0.238	1	1.137	0.576	1.036
99	scaffold1479_76107.mRNA1	Acetyl-CoA acetyltransferase, cytosolic 1 like;	6.01/41.65	7.02/45.56	7	27	639	0.047	0.056	0.071	0.043	1	1.183	1.509	0.903
155	scaffold1479_76107.mRNA1	Acetyl-CoA acetyltransferase, cytosolic 1 like;	6.01/41.65	6.46/45.87	6	29	523	0.117	0.139	0.114	0.087	1	1.19048	0.97619	0.74881
23	scaffold1735_70085.mRNA1	ricin B-like lectin EULS3	7.77/20.72	8.22/20.65	8	55	425	0.048	0.026	0.04	0.034	1	0.538	0.821	0.704
31	scaffold1735_70085.mRNA1	ricin B-like lectin EULS3	7.77/20.72	8.12/20.65	8	51	494	0.17	0.101	0.162	0.175	1	0.597	0.954	1.031
129	scaffold1735_70085.mRNA1	ricin B-like lectin EULS3	7.77/20.72	7.56/20.65	7	46	440	0.209	0.226	0.119	0.261	1	1.07875	0.568501	1.24488
124	scaffold2041_42337.mRNA1	calcium-binding protein CML49 like;	7.48/31.74	6.98/26.64	3	14	205	0.023	0.021	0.009	0.024	1	0.912409	0.375912	1.00547
5	scaffold4512_855.mRNA1	Osmotin-like protein OSM34 like;	5.23/27.68	6.22/21.43	8	50	607	0.235	0.067	0.065	0.191	1	0.284	0.278	0.813
14	scaffold4512_855.mRNA1	Osmotin-like protein OSM34 like;	5.23/27.68	6.50/21.43	6	45	467	0.016	0.008	0.032	0.008	1	0.477	2.029	0.527
57	scaffold4512_855.mRNA1	Osmotin-like protein OSM34 like;	5.23/27.68	8.13/22.32	5	34	453	1.124	1.114	0.125	0.585	1	0.992	0.111	0.521
58	scaffold4512_855.mRNA1	Osmotin-like protein OSM34 like;	5.23/27.68	6.22/22.32	4	30	348	0.082	0.09	0.01	0.036	1	1.101	0.121	0.444
81	scaffold4512_855.mRNA1	Osmotin-like protein OSM34 like;	5.23/27.68	7.73/22.32	4	30	424	0.567	0.579	0.318	0.377	1	1.021	0.56	0.665
107	scaffold4512_855.mRNA1	Osmotin-like protein OSM34 like;	5.23/27.68	7.12/22.32	4	30	350	0.168	0.129	0.122	0.098	1	0.768	0.726	0.586
63	scaffold4512_855.mRNA1	Osmotin-like protein OSM34 like;	5.23/27.68	8.00/16.04	2	12	112	0.028	0.031	0.01	0.029	1	1.097	0.335	1.033

## Sheet: q-RT-PCR results
Table S3-2 The qRT-PCR results of the 25 unique proteins
		Relative expression level				Postive SD				Negative SD
Accession number	Name	CK	Eth	Mo	EMo	CK	Eth	Mo	EMo	CK	Eth	Mo	EMo
scaffold0066_550349.mRNA1	prefoldin subunit 5 like	1	0.285632	2.133	0.773344	0.0877091	0.0233487	0.138748	0.112385	0.0806365	0.0215843	0.130274	0.0981252
scaffold0100_712967.mRNA1	Patatin-like protein 2 like	1	0.753234	0.555363	0.329573	0.157855	0.10839	0.082218	0.0514912	0.136334	0.0947548	0.0716157	0.0445335
scaffold0139_994147.mRNA1	Glucose and ribitol dehydrogenase like;	1	0.369706	0.99299	1.00779	0.148586	0.0434042	0.110897	0.125344	0.129364	0.0388439	0.0997566	0.111479
scaffold0155_515853.mRNA1	Pro-hevein like;	1	0.806324	0.750007	0.722342	0.117942	0.0671079	0.0707108	0.0598162	0.105499	0.0619518	0.0646185	0.0552417
scaffold0013_2366000.mRNA1	Annexin-like protein RJ4 like;	1	0.586096	1.12506	1.15505	0.185187	0.114301	0.146682	0.149898	0.156251	0.0956479	0.129764	0.132679
scaffold0014_190374.mRNA1	Cysteine proteinase inhibitor like;	1	0.871946	1.77821	1.06709	0.0717749	0.0450815	0.164702	0.150061	0.0669683	0.0428653	0.15074	0.13156
scaffold0017_613025.mRNA1	Cysteine proteinase inhibitor 12 like;	1	0.609641	1.58906	1.87167	0.00388508	0.0584417	0.0731927	0.112467	0.00387005	0.0533294	0.0699699	0.106092
scaffold0026_327123.mRNA1	Chlorophyllase type 0 like;	1	0.763622	0.675238	0.773418	0.0470132	0.0758279	0.0391578	0.000411392	0.0449022	0.0689783	0.0370114	0.000411173
scaffold0026_1110574.mRNA1	Actin-7 like;	1	0.708551	1.16702	1.16124	0.0559367	0.04926	0.0575434	0.0474056	0.0529735	0.046058	0.0548394	0.0455463
scaffold0029_867537.mRNA1	Universal stress protein A-like protein	1	0.644546	0.990143	1.02016	0.155508	0.0698452	0.128205	0.121006	0.13458	0.0630165	0.113508	0.108175
scaffold0470_417147.mRNA1	Phosphoinositide phospholipase C 2 like;	1	0.805292	1.32461	0.976403	0.0128883	0.072072	0.169586	0.00996022	0.0127243	0.0661515	0.150338	0.00985964
scaffold0491_874744.mRNA1	Elongation factor 1-delta like;	1	0.494377	1.76963	0.656433	0.184635	0.248962	0.29014	0.0985782	0.155858	0.165579	0.249271	0.0857073
scaffold0618_714426.mRNA1	Beta-glucosidase 42 like;	1	0.559029	1.18893	1.23893	0.128242	0.0618498	0.118106	0.130767	0.113665	0.0556886	0.107434	0.118283
scaffold0625_11329.mRNA1	Glucan endo-1,3-beta-glucosidase, basic vacuolar isoform like;	1	0.595685	0.889933	0.805962	0.0646421	0.0279284	0.0625666	0.0570285	0.0607172	0.0266776	0.0584568	0.05326
scaffold0331_686228.mRNA1	Vacuolar protein sorting-associated protein 2 homolog 1 like;	1	0.635949	5.06127	2.56783	0.216592	0.104587	0.939592	0.406667	0.178032	0.0898162	0.792475	0.351068
scaffold0331_834438.mRNA1	Phospholipase D alpha 1 like;	1	0.564276	1.13887	1.14886	0.0270378	0.0236503	0.0430278	0.0401158	0.026326	0.0226989	0.0414613	0.0387623
scaffold0427_434785.mRNA1	Superoxide dismutase [Mn], mitochondrial like;	1	1.04797	1.67097	1.13243	0.0536076	0.0536761	0.0865118	0.052419	0.0508801	0.0510608	0.0822532	0.0500999
scaffold0444_175845.mRNA1	Ubiquitin-conjugating enzyme E2 35 like;	1	0.77647	1.49781	1.4012	0.0238333	0.0340587	0.059831	0.0524379	0.0232785	0.0326275	0.0575328	0.0505463
scaffold0686_576053.mRNA1	pyridoxal biosynthesis protein PDX1 like;	1	2.66298	0.700763	0.84644	0.112497	0.209713	0.0985455	0.107003	0.101121	0.194404	0.086396	0.0949941
scaffold0944_314376.mRNA1	Glutathione S-transferase PARB like;	1	0.771425	1.36818	1.54388	0.0630828	0.0356585	0.0895059	0.0733938	0.0593395	0.0340831	0.08401	0.0700631
scaffold1173_171897.mRNA1	Aldose 1-epimerase like;	1	4.69912	1.14044	1.0969	0.0497167	0.261533	0.13057	0.0776459	0.047362	0.247745	0.117156	0.0725129
scaffold1479_76107.mRNA1	Acetyl-CoA acetyltransferase, cytosolic 1 like;	1	0.904103	1.14967	1.24119	0.0149895	0.0497666	0.0433734	0.0727402	0.0147681	0.0471701	0.0417966	0.0687132
scaffold1735_70085.mRNA1	ricin B-like lectin EULS3	1	0.72711	1.02483	1.07405	0.0487321	0.0280449	0.049616	0.0440474	0.0464677	0.0270034	0.0473248	0.0423122
scaffold2041_42337.mRNA1	calcium-binding protein CML49 like;	1	0.812504	0.795626	0.882662	0.0721795	0.0493706	0.104773	0.0977941	0.0673203	0.0465425	0.0925813	0.0880398
scaffold4512_855.mRNA1	Osmotin-like protein OSM34 like;	1	8.34288	0.445343	0.453555	0.0908137	0.836606	0.0410117	0.0516701	0.0832531	0.760358	0.0375534	0.0463858

## Sheet: Primers
Table S3-3 The primer sequence of the 25 unique proteins and the standard gene
Gene Name	Primer sequence
scaffold0066_550349.mRNA1	Forward: CGAAAAAGAAGACAGC
	Reverse: AATCAACAACGAAAAT
scaffold0100_712967.mRNA1	Forward: AGAATCATCAGGTC
	Reverse: GCTTCATTAGTAGG
scaffold0139_994147.mRNA1	Forward: GGACAGGGCAGCACAG
	Reverse: CGGAAGGAACCCACAA
scaffold0155_515853.mRNA1	Forward: AAAACGACAGTGAGGA
	Reverse: AAAGGATTGAAGGAAT
scaffold0013_2366000.mRNA1	Forward: ACTACAGCAGGAACAG
	Reverse: TCTCAAGACCAACACA
scaffold0014_190374.mRNA1	Forward: TGGTAAAATTGGGGAT
	Reverse: CAAAAGGGACAAAACG
scaffold0017_613025.mRNA1	Forward: TCAAGAGGGGAACCAG
	Reverse: AGGACCAAACGAAGCA
scaffold0026_327123.mRNA1	Forward: ACCTTCTGTTGCTCCT
	Reverse: CAAAACTCGGTTTACG
scaffold0026_1110574.mRNA1	Forward: GAGAAGTGTTGAGTGG
	Reverse: ACAAGATTTTGAGGAA
scaffold0029_867537.mRNA1	Forward: GATTAAGAGTGGTGAT
	Reverse: ACGTTTGATTGAGATA
scaffold0470_417147.mRNA1	Forward: AATAACATCTCTGCCC
	Reverse: GAAAAAGTAATAACCG
scaffold0491_874744.mRNA1	Forward: AGGATTGCTTTGGG
	Reverse: CATTCACTGGTTCA
scaffold0618_714426.mRNA1	Forward: CCTCTCCATGAAATGC
	Reverse: ATCAAACCAAAACGCT
scaffold0625_11329.mRNA1	Forward: TGCTGCCACATTTGAC
	Reverse: CCTCTGGTTGCTTCTT
scaffold0331_686228.mRNA1	Forward: ATGACAGTGGGATAGA
	Reverse: AAACCAGGAGTTAAAA
scaffold0331_834438.mRNA1	Forward: CAGAGCTTCCAGGAAC
	Reverse: GGCAGCATCGCATAAC
scaffold0427_434785.mRNA1	Forward: GGACAAAGAATTGAAGA
	Reverse: ACACTTCACTTGCATACT
scaffold0444_175845.mRNA1	Forward: GTATCCAAGCACTTCT
	Reverse: GTTTCCACCACACTAT
scaffold0686_576053.mRNA1	Forward: ATGGACGTGATTAGAG
	Reverse: TGAAGAGTTTGGGATG
scaffold0944_314376.mRNA1	Forward: GCACCACCTACCTAAC
	Reverse: AAATGACCAAACTCCC
scaffold1173_171897.mRNA1	Forward: TACACTGGAAACTATG
	Reverse: TCACTCAACTGAAAAC
scaffold1479_76107.mRNA1	Forward: GGATAGGAAGATGGGG
	Reverse: AGCAAAACTTGTGGCA
scaffold1735_70085.mRNA1	Forward: ACTGTTGTGTTCCTTG
	Reverse: CTGCATCATATGCTTA
scaffold2041_42337.mRNA1	Forward: GTCGTTTTGGATTTGC
	Reverse: TGAAGGCCTCGTAAGT
scaffold4512_855.mRNA1	Forward: TCTGGTGCAAAAGATA
	Reverse: TTGAGAATTCGGTAGG
UBC2b	Forward: CGACCAAGTTTTCATTTCGGGTG
	Reverse: AGTCTCTTCTTTGCTGGGGTTG
